# Supplementary material
Source: publisher figshare collection journal article supplement (https://acs.figshare.com/ndownloader/files/5699898)
Supplement: Supplementary file 1 [file 5699898]

# ic030070h.cif

data_1283

_audit_creation_method            SHELXL-97
_chemical_name_systematic
;
 ?
;
_chemical_name_common             2�PF6�Et2O�1.8CH2Cl2
_chemical_melting_point           ?
_chemical_formula_moiety          ?
_chemical_formula_sum
 'C126 H113.50 Cl4 Cu5 F6 O P9 S4'
_chemical_formula_weight          2624.14

loop_
 _atom_type_symbol
 _atom_type_description
 _atom_type_scat_dispersion_real
 _atom_type_scat_dispersion_imag
 _atom_type_scat_source
 'C'  'C'   0.0033   0.0016
 'International Tables Vol C Tables 4.2.6.8 and 6.1.1.4'
 'H'  'H'   0.0000   0.0000
 'International Tables Vol C Tables 4.2.6.8 and 6.1.1.4'
 'F'  'F'   0.0171   0.0103
 'International Tables Vol C Tables 4.2.6.8 and 6.1.1.4'
 'P'  'P'   0.1023   0.0942
 'International Tables Vol C Tables 4.2.6.8 and 6.1.1.4'
 'S'  'S'   0.1246   0.1234
 'International Tables Vol C Tables 4.2.6.8 and 6.1.1.4'
 'Cu'  'Cu'   0.3201   1.2651
 'International Tables Vol C Tables 4.2.6.8 and 6.1.1.4'
 'O'  'O'   0.0106   0.0060
 'International Tables Vol C Tables 4.2.6.8 and 6.1.1.4'
 'Cl'  'Cl'   0.1484   0.1585
 'International Tables Vol C Tables 4.2.6.8 and 6.1.1.4'

_symmetry_cell_setting            Monoclinic
_symmetry_space_group_name_H-M    P2(1)/c

loop_
 _symmetry_equiv_pos_as_xyz
 'x, y, z'
 '-x, y+1/2, -z+1/2'
 '-x, -y, -z'
 'x, -y-1/2, z-1/2'

_cell_length_a                    24.2364(6)
_cell_length_b                    15.6546(4)
_cell_length_c                    30.8908(8)
_cell_angle_alpha                 90.00
_cell_angle_beta                  90.8010(10)
_cell_angle_gamma                 90.00
_cell_volume                      11719.2(5)
_cell_formula_units_Z             4
_cell_measurement_temperature     223(2)
_cell_measurement_reflns_used     8235
_cell_measurement_theta_min       2.233
_cell_measurement_theta_max       24.905

_exptl_crystal_description        PLATE
_exptl_crystal_colour             YELLOW
_exptl_crystal_size_max           0.26
_exptl_crystal_size_mid           0.20
_exptl_crystal_size_min           0.10
_exptl_crystal_density_meas       ?
_exptl_crystal_density_diffrn     1.487
_exptl_crystal_density_method     'not measured'
_exptl_crystal_F_000              5374
_exptl_absorpt_coefficient_mu     1.239
_exptl_absorpt_correction_type    'Sadabs,(Sheldrick 200)'
_exptl_absorpt_correction_T_min   0.778368
_exptl_absorpt_correction_T_max   0.910409
_exptl_absorpt_process_details    ?

_exptl_special_details
;
 ?
;

_diffrn_ambient_temperature       223(2)
_diffrn_radiation_wavelength      0.71073
_diffrn_radiation_type            MoK\a
_diffrn_radiation_source          'fine-focus sealed tube'
_diffrn_radiation_monochromator   graphite
_diffrn_measurement_device_type   'CCD area detector'
_diffrn_measurement_method        'phi and omega scans'
_diffrn_detector_area_resol_mean  ?
_diffrn_standards_number          ?
_diffrn_standards_interval_count  ?
_diffrn_standards_interval_time   ?
_diffrn_standards_decay_%         ?
_diffrn_reflns_number             67174
_diffrn_reflns_av_R_equivalents   0.0678
_diffrn_reflns_av_sigmaI/netI     0.0764
_diffrn_reflns_limit_h_min        -28
_diffrn_reflns_limit_h_max        28
_diffrn_reflns_limit_k_min        -18
_diffrn_reflns_limit_k_max        18
_diffrn_reflns_limit_l_min        -36
_diffrn_reflns_limit_l_max        33
_diffrn_reflns_theta_min          1.55
_diffrn_reflns_theta_max          25.00
_reflns_number_total              20607
_reflns_number_gt                 13651
_reflns_threshold_expression      >2sigma(I)

_computing_data_collection        'Bruker SMART'
_computing_cell_refinement        'Bruker SMART'
_computing_data_reduction         'Bruker SHELXTL'
_computing_structure_solution     'SHELXS-97 (Sheldrick, 1990)'
_computing_structure_refinement   'SHELXL-97 (Sheldrick, 1997)'
_computing_molecular_graphics     'Bruker SHELXTL'
_computing_publication_material   'Bruker SHELXTL'

_refine_special_details
;
 Refinement of F^2^ against ALL reflections.  The weighted R-factor wR and
 goodness of fit S are based on F^2^, conventional R-factors R are based
 on F, with F set to zero for negative F^2^. The threshold expression of
 F^2^ > 2sigma(F^2^) is used only for calculating R-factors(gt) etc. and is
 not relevant to the choice of reflections for refinement.  R-factors based
 on F^2^ are statistically about twice as large as those based on F, and R-
 factors based on ALL data will be even larger.
;

_refine_ls_structure_factor_coef  Fsqd
_refine_ls_matrix_type            full
_refine_ls_weighting_scheme       calc
_refine_ls_weighting_details
 'calc w=1/[\s^2^(Fo^2^)+(0.0641P)^2^+0.0000P] where P=(Fo^2^+2Fc^2^)/3'
_atom_sites_solution_primary      direct
_atom_sites_solution_secondary    difmap
_atom_sites_solution_hydrogens    geom
_refine_ls_hydrogen_treatment     mixed
_refine_ls_extinction_method      none
_refine_ls_extinction_coef        ?
_refine_ls_number_reflns          20607
_refine_ls_number_parameters      1435
_refine_ls_number_restraints      127
_refine_ls_R_factor_all           0.0938
_refine_ls_R_factor_gt            0.0564
_refine_ls_wR_factor_ref          0.1351
_refine_ls_wR_factor_gt           0.1213
_refine_ls_goodness_of_fit_ref    0.998
_refine_ls_restrained_S_all       1.028
_refine_ls_shift/su_max           0.187
_refine_ls_shift/su_mean          0.004

loop_
 _atom_site_label
 _atom_site_type_symbol
 _atom_site_fract_x
 _atom_site_fract_y
 _atom_site_fract_z
 _atom_site_U_iso_or_equiv
 _atom_site_adp_type
 _atom_site_occupancy
 _atom_site_symmetry_multiplicity
 _atom_site_calc_flag
 _atom_site_refinement_flags
 _atom_site_disorder_assembly
 _atom_site_disorder_group
Cu1 Cu 0.33993(2) 0.63336(4) 0.87049(2) 0.03246(15) Uani 1 1 d . . .
Cu2 Cu 0.18196(2) 0.59998(4) 0.85675(2) 0.03668(16) Uani 1 1 d . . .
Cu3 Cu 0.15613(2) 0.82032(4) 0.91212(2) 0.03556(16) Uani 1 1 d . . .
Cu4 Cu 0.31631(2) 0.85966(4) 0.91944(2) 0.03596(16) Uani 1 1 d . . .
Cu5 Cu 0.24879(2) 0.73010(4) 0.89002(2) 0.03640(16) Uani 1 1 d . . .
S1 S 0.25705(4) 0.66783(7) 0.82361(4) 0.0307(3) Uani 1 1 d . . .
S2 S 0.24136(5) 0.87074(7) 0.87274(4) 0.0308(3) Uani 1 1 d . . .
S3 S 0.17498(5) 0.67660(7) 0.92636(4) 0.0314(3) Uani 1 1 d . . .
S4 S 0.32034(5) 0.69896(7) 0.93596(4) 0.0302(3) Uani 1 1 d . . .
P1 P 0.33144(5) 0.48998(8) 0.87266(4) 0.0311(3) Uani 1 1 d . . .
P2 P 0.20361(5) 0.46585(8) 0.87607(5) 0.0342(3) Uani 1 1 d . . .
P3 P 0.10267(5) 0.64071(8) 0.82424(4) 0.0311(3) Uani 1 1 d . . .
P4 P 0.09046(5) 0.82903(7) 0.85972(4) 0.0282(3) Uani 1 1 d . . .
P5 P 0.16364(5) 0.90134(8) 0.97245(4) 0.0338(3) Uani 1 1 d . . .
P6 P 0.29378(5) 0.91479(8) 0.98389(4) 0.0324(3) Uani 1 1 d . . .
P7 P 0.39737(5) 0.87721(8) 0.88605(4) 0.0307(3) Uani 1 1 d . . .
P8 P 0.41064(5) 0.70133(8) 0.83912(4) 0.0287(3) Uani 1 1 d . . .
C1 C 0.24516(17) 0.7421(3) 0.78022(16) 0.0317(11) Uani 1 1 d . . .
C2 C 0.2358(2) 0.7004(3) 0.74203(17) 0.0438(13) Uani 1 1 d . . .
H2 H 0.2308 0.6409 0.7427 0.053 Uiso 1 1 calc R . .
C3 C 0.2334(2) 0.7416(4) 0.70221(18) 0.0548(16) Uani 1 1 d . . .
H3 H 0.2255 0.7107 0.6768 0.066 Uiso 1 1 calc R . .
C4 C 0.2424(2) 0.8270(4) 0.70042(19) 0.0549(16) Uani 1 1 d . . .
H4 H 0.2425 0.8549 0.6735 0.066 Uiso 1 1 calc R . .
C5 C 0.2514(2) 0.8743(4) 0.73854(18) 0.0441(14) Uani 1 1 d . . .
C6 C 0.2613(2) 0.9629(4) 0.7342(2) 0.0542(16) Uani 1 1 d . . .
H6 H 0.2610 0.9877 0.7065 0.065 Uiso 1 1 calc R . .
C7 C 0.2711(2) 1.0123(4) 0.7692(2) 0.0574(16) Uani 1 1 d . . .
H7 H 0.2799 1.0704 0.7659 0.069 Uiso 1 1 calc R . .
C8 C 0.2680(2) 0.9759(3) 0.81046(19) 0.0453(14) Uani 1 1 d . . .
H8 H 0.2740 1.0112 0.8347 0.054 Uiso 1 1 calc R . .
C9 C 0.25652(17) 0.8907(3) 0.81714(15) 0.0302(11) Uani 1 1 d . . .
C10 C 0.25138(17) 0.8337(3) 0.78078(15) 0.0299(11) Uani 1 1 d . . .
C11 C 0.19331(19) 0.6425(3) 0.97981(15) 0.0291(11) Uani 1 1 d . . .
C12 C 0.1470(2) 0.6319(3) 1.00472(18) 0.0486(14) Uani 1 1 d . . .
H12 H 0.1128 0.6507 0.9936 0.058 Uiso 1 1 calc R . .
C13 C 0.1487(3) 0.5947(4) 1.0456(2) 0.0659(18) Uani 1 1 d . . .
H13 H 0.1167 0.5922 1.0623 0.079 Uiso 1 1 calc R . .
C14 C 0.1964(3) 0.5621(4) 1.0612(2) 0.0575(16) Uani 1 1 d . . .
H14 H 0.1970 0.5337 1.0880 0.069 Uiso 1 1 calc R . .
C15 C 0.2455(2) 0.5706(3) 1.03725(18) 0.0465(14) Uani 1 1 d . . .
C16 C 0.2939(3) 0.5329(4) 1.0549(2) 0.0624(17) Uani 1 1 d . . .
H16 H 0.2920 0.5029 1.0811 0.075 Uiso 1 1 calc R . .
C17 C 0.3424(3) 0.5393(4) 1.0348(2) 0.0666(18) Uani 1 1 d . . .
H17 H 0.3739 0.5115 1.0459 0.080 Uiso 1 1 calc R . .
C18 C 0.3453(2) 0.5887(4) 0.99665(18) 0.0500(14) Uani 1 1 d . . .
H18 H 0.3797 0.5947 0.9833 0.060 Uiso 1 1 calc R . .
C19 C 0.30058(19) 0.6282(3) 0.97809(15) 0.0314(11) Uani 1 1 d . . .
C20 C 0.24657(19) 0.6162(3) 0.99659(15) 0.0313(11) Uani 1 1 d . . .
C21 C 0.27118(18) 0.4489(3) 0.90198(16) 0.0329(11) Uani 1 1 d . . .
H21A H 0.2762 0.3874 0.9064 0.039 Uiso 1 1 calc R . .
H21B H 0.2708 0.4758 0.9306 0.039 Uiso 1 1 calc R . .
C22 C 0.09653(17) 0.7559(3) 0.81348(15) 0.0276(10) Uani 1 1 d . . .
H22A H 0.1289 0.7734 0.7970 0.033 Uiso 1 1 calc R . .
H22B H 0.0641 0.7645 0.7946 0.033 Uiso 1 1 calc R . .
C23 C 0.22648(18) 0.8852(3) 1.00613(16) 0.0348(12) Uani 1 1 d . . .
H23A H 0.2218 0.9174 1.0330 0.042 Uiso 1 1 calc R . .
H23B H 0.2282 0.8246 1.0140 0.042 Uiso 1 1 calc R . .
C24 C 0.40734(18) 0.8186(3) 0.83509(15) 0.0301(11) Uani 1 1 d . . .
H24A H 0.4416 0.8387 0.8221 0.036 Uiso 1 1 calc R . .
H24B H 0.3771 0.8336 0.8152 0.036 Uiso 1 1 calc R . .
C1A C 0.3888(2) 0.4375(3) 0.90204(17) 0.0363(12) Uani 1 1 d . . .
C2A C 0.4395(2) 0.4349(3) 0.8821(2) 0.0528(15) Uani 1 1 d . . .
H2A H 0.4430 0.4577 0.8541 0.063 Uiso 1 1 calc R . .
C3A C 0.4847(2) 0.3997(4) 0.9025(2) 0.0627(17) Uani 1 1 d . . .
H3A H 0.5190 0.3986 0.8886 0.075 Uiso 1 1 calc R . .
C4A C 0.4795(3) 0.3659(4) 0.9434(2) 0.0657(19) Uani 1 1 d . . .
H4A H 0.5105 0.3428 0.9578 0.079 Uiso 1 1 calc R . .
C5A C 0.4297(3) 0.3660(4) 0.9632(2) 0.0673(18) Uani 1 1 d . . .
H5A H 0.4260 0.3408 0.9906 0.081 Uiso 1 1 calc R . .
C6A C 0.3845(2) 0.4031(4) 0.94291(18) 0.0528(15) Uani 1 1 d . . .
H6A H 0.3505 0.4049 0.9571 0.063 Uiso 1 1 calc R . .
C1B C 0.33236(17) 0.4324(3) 0.82149(15) 0.0309(11) Uani 1 1 d . . .
C2B C 0.33319(18) 0.4788(3) 0.78328(17) 0.0382(12) Uani 1 1 d . . .
H2B H 0.3330 0.5389 0.7840 0.046 Uiso 1 1 calc R . .
C3B C 0.3343(2) 0.4364(4) 0.7442(2) 0.0533(15) Uani 1 1 d . . .
H3B H 0.3353 0.4678 0.7182 0.064 Uiso 1 1 calc R . .
C4B C 0.3340(2) 0.3490(4) 0.7428(2) 0.0561(16) Uani 1 1 d . . .
H4B H 0.3346 0.3208 0.7159 0.067 Uiso 1 1 calc R . .
C5B C 0.3328(2) 0.3020(4) 0.7803(2) 0.0505(15) Uani 1 1 d . . .
H5B H 0.3321 0.2420 0.7792 0.061 Uiso 1 1 calc R . .
C6B C 0.33268(19) 0.3432(3) 0.81965(18) 0.0399(13) Uani 1 1 d . . .
H6B H 0.3328 0.3113 0.8454 0.048 Uiso 1 1 calc R . .
C1C C 0.20010(18) 0.3802(3) 0.83622(17) 0.0357(12) Uani 1 1 d . . .
C2C C 0.2009(2) 0.2942(3) 0.84799(19) 0.0456(14) Uani 1 1 d . . .
H2C H 0.2031 0.2792 0.8774 0.055 Uiso 1 1 calc R . .
C3C C 0.1983(2) 0.2307(4) 0.8169(2) 0.0553(16) Uani 1 1 d . . .
H3C H 0.1986 0.1729 0.8252 0.066 Uiso 1 1 calc R . .
C4C C 0.1952(2) 0.2519(4) 0.7742(2) 0.0586(17) Uani 1 1 d . . .
H4C H 0.1934 0.2086 0.7531 0.070 Uiso 1 1 calc R . .
C5C C 0.1949(2) 0.3361(4) 0.7616(2) 0.0545(15) Uani 1 1 d . . .
H5C H 0.1928 0.3503 0.7321 0.065 Uiso 1 1 calc R . .
C6C C 0.19761(19) 0.4003(3) 0.79275(19) 0.0453(14) Uani 1 1 d . . .
H6C H 0.1978 0.4579 0.7841 0.054 Uiso 1 1 calc R . .
C1D C 0.1556(2) 0.4268(3) 0.9172(2) 0.0502(16) Uani 1 1 d . . .
C2D C 0.1030(2) 0.4035(4) 0.9028(3) 0.084(3) Uani 1 1 d . . .
H2D H 0.0945 0.4042 0.8730 0.101 Uiso 1 1 calc R . .
C3D C 0.0633(3) 0.3794(5) 0.9318(4) 0.114(4) Uani 1 1 d . . .
H3D H 0.0276 0.3652 0.9217 0.137 Uiso 1 1 calc R . .
C4D C 0.0753(4) 0.3762(5) 0.9749(4) 0.109(4) Uani 1 1 d . . .
H4D H 0.0483 0.3581 0.9944 0.131 Uiso 1 1 calc R . .
C5D C 0.1266(5) 0.3990(4) 0.9899(3) 0.109(4) Uani 1 1 d . . .
H5D H 0.1347 0.3981 1.0197 0.131 Uiso 1 1 calc R . .
C6D C 0.1668(3) 0.4238(4) 0.9605(2) 0.084(3) Uani 1 1 d . . .
H6D H 0.2022 0.4387 0.9707 0.101 Uiso 1 1 calc R . .
C1E C 0.03616(18) 0.6110(3) 0.84710(18) 0.0354(12) Uani 1 1 d . . .
C2E C -0.0122(2) 0.6146(3) 0.8227(2) 0.0473(14) Uani 1 1 d . . .
H2E H -0.0106 0.6301 0.7934 0.057 Uiso 1 1 calc R . .
C3E C -0.0628(2) 0.5958(4) 0.8407(3) 0.0601(18) Uani 1 1 d . . .
H3E H -0.0954 0.5988 0.8238 0.072 Uiso 1 1 calc R . .
C4E C -0.0646(2) 0.5728(4) 0.8834(3) 0.067(2) Uani 1 1 d . . .
H4E H -0.0988 0.5606 0.8961 0.080 Uiso 1 1 calc R . .
C5E C -0.0170(3) 0.5676(4) 0.9078(2) 0.0637(17) Uani 1 1 d . . .
H5E H -0.0186 0.5502 0.9369 0.076 Uiso 1 1 calc R . .
C6E C 0.0333(2) 0.5879(3) 0.88994(19) 0.0471(14) Uani 1 1 d . . .
H6E H 0.0656 0.5858 0.9071 0.057 Uiso 1 1 calc R . .
C1F C 0.09656(18) 0.5968(3) 0.76989(17) 0.0346(12) Uani 1 1 d . . .
C2F C 0.0864(2) 0.5098(3) 0.7659(2) 0.0513(15) Uani 1 1 d . . .
H2F H 0.0813 0.4770 0.7910 0.062 Uiso 1 1 calc R . .
C3F C 0.0835(2) 0.4707(4) 0.7265(2) 0.0641(18) Uani 1 1 d . . .
H3F H 0.0765 0.4117 0.7248 0.077 Uiso 1 1 calc R . .
C4F C 0.0907(2) 0.5166(4) 0.6893(2) 0.0644(18) Uani 1 1 d . . .
H4F H 0.0886 0.4897 0.6621 0.077 Uiso 1 1 calc R . .
C5F C 0.1011(2) 0.6029(4) 0.6922(2) 0.0629(17) Uani 1 1 d . . .
H5F H 0.1062 0.6350 0.6669 0.076 Uiso 1 1 calc R . .
C6F C 0.1042(2) 0.6430(4) 0.73247(19) 0.0472(14) Uani 1 1 d . . .
H6F H 0.1116 0.7019 0.7341 0.057 Uiso 1 1 calc R . .
C1G C 0.01977(19) 0.8162(3) 0.87835(17) 0.0333(12) Uani 1 1 d . . .
C2G C 0.0110(2) 0.8092(4) 0.9219(2) 0.0582(17) Uani 1 1 d . . .
H2G H 0.0412 0.8077 0.9413 0.070 Uiso 1 1 calc R . .
C3G C -0.0427(3) 0.8042(5) 0.9376(3) 0.081(2) Uani 1 1 d . . .
H3G H -0.0488 0.8010 0.9675 0.098 Uiso 1 1 calc R . .
C4G C -0.0866(2) 0.8042(4) 0.9088(3) 0.071(2) Uani 1 1 d . . .
H4G H -0.1228 0.8005 0.9192 0.085 Uiso 1 1 calc R . .
C5G C -0.0780(2) 0.8094(4) 0.8654(2) 0.0565(17) Uani 1 1 d . . .
H5G H -0.1081 0.8083 0.8459 0.068 Uiso 1 1 calc R . .
C6G C -0.02501(19) 0.8164(3) 0.8501(2) 0.0461(14) Uani 1 1 d . . .
H6G H -0.0193 0.8214 0.8202 0.055 Uiso 1 1 calc R . .
C1H C 0.08592(17) 0.9310(3) 0.83002(15) 0.0279(11) Uani 1 1 d . . .
C2H C 0.0486(2) 0.9937(3) 0.84178(18) 0.0434(13) Uani 1 1 d . . .
H2H H 0.0240 0.9831 0.8644 0.052 Uiso 1 1 calc R . .
C3H C 0.0471(2) 1.0715(3) 0.8207(2) 0.0504(15) Uani 1 1 d . . .
H3H H 0.0214 1.1131 0.8290 0.060 Uiso 1 1 calc R . .
C4H C 0.0826(2) 1.0882(3) 0.78793(19) 0.0456(14) Uani 1 1 d . . .
H4H H 0.0817 1.1414 0.7738 0.055 Uiso 1 1 calc R . .
C5H C 0.1198(2) 1.0266(3) 0.77572(19) 0.0511(15) Uani 1 1 d . . .
H5H H 0.1442 1.0374 0.7529 0.061 Uiso 1 1 calc R . .
C6H C 0.1214(2) 0.9494(3) 0.79678(18) 0.0452(14) Uani 1 1 d . . .
H6H H 0.1473 0.9081 0.7883 0.054 Uiso 1 1 calc R . .
C1I C 0.1105(2) 0.8821(3) 1.01302(17) 0.0406(13) Uani 1 1 d . . .
C2I C 0.1160(2) 0.8212(4) 1.0443(2) 0.0609(17) Uani 1 1 d . . .
H2I H 0.1493 0.7907 1.0465 0.073 Uiso 1 1 calc R . .
C3I C 0.0743(3) 0.8027(4) 1.0730(2) 0.074(2) Uani 1 1 d . . .
H3I H 0.0797 0.7600 1.0941 0.089 Uiso 1 1 calc R . .
C4I C 0.0261(3) 0.8456(5) 1.0710(2) 0.080(2) Uani 1 1 d . . .
H4I H -0.0023 0.8336 1.0904 0.096 Uiso 1 1 calc R . .
C5I C 0.0198(4) 0.9054(7) 1.0407(4) 0.161(6) Uani 1 1 d . . .
H5I H -0.0139 0.9348 1.0384 0.194 Uiso 1 1 calc R . .
C6I C 0.0619(3) 0.9254(6) 1.0124(3) 0.131(4) Uani 1 1 d . . .
H6I H 0.0566 0.9699 0.9923 0.157 Uiso 1 1 calc R . .
C1J C 0.15806(19) 1.0156(3) 0.96308(16) 0.0366(12) Uani 1 1 d . . .
C2J C 0.1616(2) 1.0753(3) 0.99609(18) 0.0475(14) Uani 1 1 d . . .
H2J H 0.1681 1.0572 1.0247 0.057 Uiso 1 1 calc R . .
C3J C 0.1555(2) 1.1609(3) 0.9871(2) 0.0521(15) Uani 1 1 d . . .
H3J H 0.1592 1.2013 1.0095 0.063 Uiso 1 1 calc R . .
C4J C 0.1442(2) 1.1873(4) 0.9458(2) 0.0544(16) Uani 1 1 d . . .
H4J H 0.1394 1.2458 0.9400 0.065 Uiso 1 1 calc R . .
C5J C 0.1398(2) 1.1295(4) 0.9128(2) 0.0522(15) Uani 1 1 d . . .
H5J H 0.1317 1.1479 0.8845 0.063 Uiso 1 1 calc R . .
C6J C 0.1474(2) 1.0426(3) 0.92171(17) 0.0398(12) Uani 1 1 d . . .
H6J H 0.1452 1.0025 0.8991 0.048 Uiso 1 1 calc R . .
C1K C 0.29506(19) 1.0314(3) 0.98870(18) 0.0401(13) Uani 1 1 d . . .
C2K C 0.2963(2) 1.0795(3) 0.9516(2) 0.0487(14) Uani 1 1 d . . .
H2K H 0.2975 1.0524 0.9245 0.058 Uiso 1 1 calc R . .
C3K C 0.2959(3) 1.1684(4) 0.9541(3) 0.0682(19) Uani 1 1 d . . .
H3K H 0.2963 1.2013 0.9287 0.082 Uiso 1 1 calc R . .
C4K C 0.2950(3) 1.2071(4) 0.9932(3) 0.076(2) Uani 1 1 d . . .
H4K H 0.2954 1.2671 0.9947 0.091 Uiso 1 1 calc R . .
C5K C 0.2934(2) 1.1609(4) 1.0301(3) 0.0664(19) Uani 1 1 d . . .
H5K H 0.2920 1.1888 1.0570 0.080 Uiso 1 1 calc R . .
C6K C 0.2939(2) 1.0723(3) 1.0284(2) 0.0514(15) Uani 1 1 d . . .
H6K H 0.2935 1.0402 1.0541 0.062 Uiso 1 1 calc R . .
C1L C 0.33959(19) 0.8773(3) 1.02800(16) 0.0365(12) Uani 1 1 d . . .
C2L C 0.3863(2) 0.9245(4) 1.03978(18) 0.0490(14) Uani 1 1 d . . .
H2L H 0.3929 0.9778 1.0269 0.059 Uiso 1 1 calc R . .
C3L C 0.4228(2) 0.8924(4) 1.07047(19) 0.0562(16) Uani 1 1 d . . .
H3L H 0.4539 0.9249 1.0787 0.067 Uiso 1 1 calc R . .
C4L C 0.4146(3) 0.8153(4) 1.0888(2) 0.0636(18) Uani 1 1 d . . .
H4L H 0.4401 0.7940 1.1093 0.076 Uiso 1 1 calc R . .
C5L C 0.3684(3) 0.7673(4) 1.0773(2) 0.0649(18) Uani 1 1 d . . .
H5L H 0.3623 0.7137 1.0901 0.078 Uiso 1 1 calc R . .
C6L C 0.3315(2) 0.7993(3) 1.04697(18) 0.0489(14) Uani 1 1 d . . .
H6L H 0.3003 0.7669 1.0392 0.059 Uiso 1 1 calc R . .
C1M C 0.40788(18) 0.9890(3) 0.86999(17) 0.0344(12) Uani 1 1 d . . .
C2M C 0.4180(2) 1.0478(3) 0.9025(2) 0.0515(15) Uani 1 1 d . . .
H2M H 0.4197 1.0296 0.9315 0.062 Uiso 1 1 calc R . .
C3M C 0.4257(2) 1.1336(4) 0.8928(2) 0.0600(17) Uani 1 1 d . . .
H3M H 0.4328 1.1733 0.9150 0.072 Uiso 1 1 calc R . .
C4M C 0.4228(2) 1.1595(4) 0.8507(3) 0.0645(19) Uani 1 1 d . . .
H4M H 0.4283 1.2175 0.8440 0.077 Uiso 1 1 calc R . .
C5M C 0.4122(3) 1.1026(4) 0.8178(2) 0.0629(17) Uani 1 1 d . . .
H5M H 0.4103 1.1216 0.7890 0.076 Uiso 1 1 calc R . .
C6M C 0.4042(2) 1.0167(3) 0.82742(19) 0.0462(14) Uani 1 1 d . . .
H6M H 0.3964 0.9776 0.8051 0.055 Uiso 1 1 calc R . .
C1N C 0.46106(19) 0.8609(3) 0.91749(17) 0.0359(12) Uani 1 1 d . . .
C2N C 0.4578(2) 0.8295(3) 0.95878(18) 0.0459(14) Uani 1 1 d . . .
H2N H 0.4235 0.8123 0.9696 0.055 Uiso 1 1 calc R . .
C3N C 0.5049(2) 0.8230(4) 0.98476(19) 0.0575(16) Uani 1 1 d . . .
H3N H 0.5023 0.8034 1.0134 0.069 Uiso 1 1 calc R . .
C4N C 0.5552(2) 0.8452(4) 0.9684(2) 0.0608(18) Uani 1 1 d . . .
H4N H 0.5872 0.8403 0.9858 0.073 Uiso 1 1 calc R . .
C5N C 0.5589(2) 0.8746(4) 0.9268(2) 0.0564(16) Uani 1 1 d . . .
H5N H 0.5935 0.8892 0.9155 0.068 Uiso 1 1 calc R . .
C6N C 0.5121(2) 0.8826(3) 0.90161(19) 0.0471(14) Uani 1 1 d . . .
H6N H 0.5149 0.9032 0.8731 0.057 Uiso 1 1 calc R . .
C1O C 0.47919(18) 0.6814(3) 0.86179(17) 0.0339(12) Uani 1 1 d . . .
C2O C 0.4841(2) 0.6370(3) 0.89972(18) 0.0453(14) Uani 1 1 d . . .
H2O H 0.4522 0.6175 0.9135 0.054 Uiso 1 1 calc R . .
C3O C 0.5351(2) 0.6203(4) 0.9182(2) 0.0642(18) Uani 1 1 d . . .
H3O H 0.5378 0.5901 0.9445 0.077 Uiso 1 1 calc R . .
C4O C 0.5818(2) 0.6477(4) 0.8981(2) 0.0677(19) Uani 1 1 d . . .
H4O H 0.6166 0.6361 0.9106 0.081 Uiso 1 1 calc R . .
C5O C 0.5781(2) 0.6925(4) 0.8594(2) 0.0665(19) Uani 1 1 d . . .
H5O H 0.6103 0.7115 0.8457 0.080 Uiso 1 1 calc R . .
C6O C 0.52702(19) 0.7091(4) 0.8412(2) 0.0501(15) Uani 1 1 d . . .
H6O H 0.5243 0.7391 0.8149 0.060 Uiso 1 1 calc R . .
C1P C 0.41706(18) 0.6697(3) 0.78233(16) 0.0319(11) Uani 1 1 d . . .
C2P C 0.3815(2) 0.7020(3) 0.75100(18) 0.0421(13) Uani 1 1 d . . .
H2P H 0.3560 0.7447 0.7583 0.050 Uiso 1 1 calc R . .
C3P C 0.3833(2) 0.6716(4) 0.70906(19) 0.0523(15) Uani 1 1 d . . .
H3P H 0.3591 0.6942 0.6879 0.063 Uiso 1 1 calc R . .
C4P C 0.4201(3) 0.6084(4) 0.6978(2) 0.0571(16) Uani 1 1 d . . .
H4P H 0.4214 0.5882 0.6692 0.069 Uiso 1 1 calc R . .
C5P C 0.4549(2) 0.5752(4) 0.7293(2) 0.0523(15) Uani 1 1 d . . .
H5P H 0.4798 0.5317 0.7220 0.063 Uiso 1 1 calc R . .
C6P C 0.4535(2) 0.6051(3) 0.77099(18) 0.0408(13) Uani 1 1 d . . .
H6P H 0.4773 0.5816 0.7921 0.049 Uiso 1 1 calc R . .
P9 P 0.24055(6) 0.18165(10) 0.64389(6) 0.0555(4) Uani 1 1 d D . .
F1 F 0.2673(7) 0.2716(6) 0.6386(4) 0.147(7) Uani 0.50 1 d PD A 1
F2 F 0.1934(5) 0.2208(13) 0.6694(3) 0.128(7) Uani 0.50 1 d PD A 1
F3 F 0.2162(6) 0.0925(7) 0.6478(4) 0.134(6) Uani 0.50 1 d PD A 1
F4 F 0.2872(3) 0.1458(10) 0.6152(4) 0.119(6) Uani 0.50 1 d PD A 1
F1A F 0.1947(4) 0.1414(12) 0.6735(5) 0.127(5) Uani 0.50 1 d PD A 2
F2A F 0.2619(9) 0.0884(7) 0.6389(4) 0.134(6) Uani 0.50 1 d PD A 2
F3A F 0.2884(4) 0.2182(17) 0.6207(7) 0.236(15) Uani 0.50 1 d PD A 2
F4A F 0.2154(7) 0.2677(7) 0.6556(7) 0.147(8) Uani 0.50 1 d PD A 2
F5 F 0.27607(16) 0.1744(3) 0.68645(14) 0.1002(14) Uani 1 1 d D A .
F6 F 0.2054(2) 0.1899(4) 0.60231(15) 0.165(3) Uani 1 1 d D A .
O1S O 0.5443(2) 0.4510(5) 0.7970(2) 0.156(3) Uani 1 1 d D . .
C3S C 0.6258(3) 0.4443(7) 0.8426(2) 0.123(4) Uani 1 1 d D . .
H3S1 H 0.6047 0.4559 0.8683 0.185 Uiso 1 1 calc R . .
H3S2 H 0.6625 0.4683 0.8459 0.185 Uiso 1 1 calc R . .
H3S3 H 0.6286 0.3830 0.8384 0.185 Uiso 1 1 calc R . .
C4S C 0.5970(3) 0.4845(6) 0.8034(3) 0.134(4) Uani 1 1 d D . .
H4S1 H 0.5944 0.5464 0.8076 0.161 Uiso 1 1 calc R . .
H4S2 H 0.6190 0.4742 0.7775 0.161 Uiso 1 1 calc R . .
C5S C 0.5401(3) 0.3677(6) 0.7865(3) 0.130(4) Uani 1 1 d D . .
H5S1 H 0.5505 0.3334 0.8119 0.156 Uiso 1 1 calc R . .
H5S2 H 0.5665 0.3552 0.7637 0.156 Uiso 1 1 calc R . .
C6S C 0.4832(4) 0.3406(5) 0.7712(3) 0.125(3) Uani 1 1 d D . .
H6S1 H 0.4558 0.3631 0.7907 0.187 Uiso 1 1 calc R . .
H6S2 H 0.4810 0.2787 0.7707 0.187 Uiso 1 1 calc R . .
H6S3 H 0.4763 0.3626 0.7423 0.187 Uiso 1 1 calc R . .
C1S C 0.0335(3) 0.8908(4) 0.6939(3) 0.099(3) Uani 1 1 d . . .
H1S1 H 0.0360 0.9207 0.7218 0.119 Uiso 1 1 calc R . .
H1S2 H 0.0183 0.9310 0.6726 0.119 Uiso 1 1 calc R . .
Cl1A Cl -0.01165(9) 0.80632(12) 0.69893(11) 0.1289(10) Uani 1 1 d . . .
Cl1B Cl 0.09909(9) 0.86231(13) 0.67842(8) 0.1071(7) Uani 1 1 d . . .
C2S C 0.2387(4) 0.4775(7) 0.6474(3) 0.092(3) Uani 0.80 1 d P . .
H2S1 H 0.2254 0.4893 0.6766 0.110 Uiso 0.80 1 calc PR . .
H2S2 H 0.2501 0.4175 0.6464 0.110 Uiso 0.80 1 calc PR . .
Cl2A Cl 0.18617(13) 0.4930(3) 0.61125(10) 0.1548(16) Uani 0.80 1 d P . .
Cl2B Cl 0.29337(15) 0.5393(2) 0.63774(10) 0.1419(14) Uani 0.80 1 d P . .

loop_
 _atom_site_aniso_label
 _atom_site_aniso_U_11
 _atom_site_aniso_U_22
 _atom_site_aniso_U_33
 _atom_site_aniso_U_23
 _atom_site_aniso_U_13
 _atom_site_aniso_U_12
Cu1 0.0295(3) 0.0268(3) 0.0412(4) 0.0005(3) 0.0046(3) -0.0003(3)
Cu2 0.0284(3) 0.0222(3) 0.0592(4) 0.0042(3) -0.0090(3) -0.0001(2)
Cu3 0.0339(3) 0.0313(3) 0.0412(4) -0.0024(3) -0.0067(3) 0.0098(3)
Cu4 0.0321(3) 0.0383(4) 0.0374(4) -0.0069(3) -0.0004(3) -0.0021(3)
Cu5 0.0382(3) 0.0343(3) 0.0366(4) 0.0088(3) -0.0020(3) 0.0026(3)
S1 0.0258(6) 0.0273(6) 0.0389(7) 0.0040(5) -0.0044(5) 0.0011(5)
S2 0.0290(6) 0.0284(6) 0.0349(7) 0.0031(5) -0.0010(5) 0.0020(5)
S3 0.0311(6) 0.0251(6) 0.0378(8) 0.0041(5) -0.0018(5) 0.0027(5)
S4 0.0335(6) 0.0248(6) 0.0323(7) 0.0022(5) -0.0015(5) 0.0007(5)
P1 0.0319(6) 0.0255(7) 0.0357(8) 0.0002(6) -0.0021(6) 0.0051(5)
P2 0.0326(7) 0.0210(6) 0.0491(9) 0.0034(6) 0.0045(6) 0.0002(5)
P3 0.0246(6) 0.0232(6) 0.0454(8) 0.0012(6) -0.0054(6) 0.0001(5)
P4 0.0236(6) 0.0237(6) 0.0373(8) 0.0036(5) -0.0006(5) 0.0038(5)
P5 0.0347(7) 0.0318(7) 0.0350(8) 0.0002(6) -0.0007(6) 0.0078(6)
P6 0.0353(7) 0.0269(7) 0.0348(8) -0.0033(6) -0.0053(6) 0.0032(6)
P7 0.0278(6) 0.0282(7) 0.0360(8) 0.0014(6) -0.0043(5) -0.0010(5)
P8 0.0239(6) 0.0281(7) 0.0340(8) 0.0020(5) -0.0008(5) 0.0014(5)
C1 0.023(2) 0.038(3) 0.034(3) 0.008(2) 0.004(2) -0.002(2)
C2 0.047(3) 0.043(3) 0.041(4) -0.003(3) -0.007(3) 0.001(3)
C3 0.058(4) 0.075(5) 0.030(3) -0.005(3) -0.008(3) 0.000(3)
C4 0.054(4) 0.077(5) 0.033(4) 0.021(3) 0.000(3) -0.003(3)
C5 0.033(3) 0.059(4) 0.041(3) 0.016(3) 0.005(2) 0.001(3)
C6 0.062(4) 0.055(4) 0.046(4) 0.027(3) 0.003(3) 0.001(3)
C7 0.068(4) 0.040(3) 0.064(4) 0.023(3) -0.005(3) -0.006(3)
C8 0.047(3) 0.030(3) 0.059(4) 0.010(3) -0.002(3) -0.002(2)
C9 0.021(2) 0.032(3) 0.037(3) 0.005(2) -0.007(2) 0.003(2)
C10 0.024(2) 0.037(3) 0.028(3) 0.008(2) -0.005(2) 0.000(2)
C11 0.040(3) 0.019(2) 0.028(3) 0.000(2) 0.003(2) -0.002(2)
C12 0.043(3) 0.054(4) 0.050(4) 0.009(3) 0.005(3) -0.005(3)
C13 0.071(4) 0.074(5) 0.054(4) 0.011(4) 0.024(3) -0.014(4)
C14 0.072(4) 0.056(4) 0.044(4) 0.020(3) 0.007(3) -0.011(3)
C15 0.066(4) 0.034(3) 0.040(3) 0.008(2) 0.001(3) -0.001(3)
C16 0.083(5) 0.056(4) 0.048(4) 0.028(3) -0.011(4) 0.006(4)
C17 0.066(4) 0.074(5) 0.059(4) 0.021(4) -0.010(4) 0.028(4)
C18 0.051(3) 0.055(4) 0.044(4) 0.012(3) -0.005(3) 0.015(3)
C19 0.043(3) 0.022(2) 0.028(3) 0.003(2) -0.003(2) 0.008(2)
C20 0.047(3) 0.020(2) 0.027(3) 0.003(2) 0.000(2) 0.001(2)
C21 0.039(3) 0.026(3) 0.033(3) 0.000(2) 0.001(2) 0.003(2)
C22 0.023(2) 0.025(2) 0.035(3) 0.004(2) -0.005(2) 0.0006(19)
C23 0.041(3) 0.032(3) 0.031(3) 0.004(2) -0.006(2) 0.006(2)
C24 0.032(2) 0.026(2) 0.033(3) 0.002(2) -0.005(2) 0.001(2)
C1A 0.039(3) 0.026(3) 0.044(3) -0.002(2) -0.011(2) 0.006(2)
C2A 0.046(3) 0.048(3) 0.064(4) 0.008(3) -0.005(3) 0.008(3)
C3A 0.046(3) 0.060(4) 0.082(5) 0.009(4) -0.011(3) 0.005(3)
C4A 0.054(4) 0.057(4) 0.086(5) 0.000(4) -0.033(4) 0.016(3)
C5A 0.075(5) 0.068(4) 0.058(4) 0.004(3) -0.020(4) 0.015(4)
C6A 0.057(3) 0.057(4) 0.044(4) 0.003(3) -0.007(3) 0.017(3)
C1B 0.027(2) 0.033(3) 0.032(3) -0.003(2) 0.000(2) 0.002(2)
C2B 0.033(3) 0.042(3) 0.040(3) -0.001(3) -0.003(2) -0.009(2)
C3B 0.052(3) 0.060(4) 0.048(4) 0.000(3) 0.001(3) -0.013(3)
C4B 0.052(3) 0.067(4) 0.049(4) -0.027(3) 0.006(3) -0.006(3)
C5B 0.045(3) 0.041(3) 0.065(4) -0.013(3) 0.002(3) 0.005(3)
C6B 0.036(3) 0.034(3) 0.050(4) -0.009(3) 0.000(2) 0.004(2)
C1C 0.029(2) 0.031(3) 0.048(3) -0.003(2) 0.001(2) -0.005(2)
C2C 0.047(3) 0.033(3) 0.057(4) 0.002(3) 0.007(3) -0.005(3)
C3C 0.059(4) 0.034(3) 0.073(5) -0.009(3) 0.013(3) -0.009(3)
C4C 0.053(4) 0.051(4) 0.072(5) -0.024(3) 0.011(3) -0.015(3)
C5C 0.043(3) 0.067(4) 0.054(4) -0.004(3) -0.002(3) -0.005(3)
C6C 0.035(3) 0.036(3) 0.065(4) 0.008(3) 0.003(3) -0.001(2)
C1D 0.059(4) 0.015(3) 0.077(5) 0.004(3) 0.026(3) 0.006(2)
C2D 0.044(4) 0.068(5) 0.142(7) 0.061(5) 0.022(4) 0.013(3)
C3D 0.053(4) 0.074(6) 0.216(12) 0.066(7) 0.058(6) 0.022(4)
C4D 0.133(8) 0.033(4) 0.165(10) 0.002(5) 0.108(8) 0.005(5)
C5D 0.195(10) 0.053(5) 0.082(6) -0.030(4) 0.081(7) -0.047(6)
C6D 0.138(7) 0.039(4) 0.077(6) -0.026(3) 0.056(5) -0.039(4)
C1E 0.031(3) 0.023(2) 0.053(4) 0.003(2) 0.005(2) 0.001(2)
C2E 0.038(3) 0.034(3) 0.070(4) 0.006(3) -0.004(3) -0.001(2)
C3E 0.030(3) 0.050(4) 0.100(6) -0.001(4) 0.002(3) -0.007(3)
C4E 0.037(3) 0.049(4) 0.115(6) -0.009(4) 0.023(4) -0.014(3)
C5E 0.062(4) 0.062(4) 0.067(5) 0.004(3) 0.018(4) -0.006(3)
C6E 0.039(3) 0.045(3) 0.057(4) 0.002(3) 0.001(3) -0.006(3)
C1F 0.025(2) 0.030(3) 0.049(3) -0.008(2) -0.004(2) 0.000(2)
C2F 0.048(3) 0.039(3) 0.066(4) -0.008(3) -0.015(3) 0.003(3)
C3F 0.062(4) 0.051(4) 0.078(5) -0.022(4) -0.030(4) 0.003(3)
C4F 0.056(4) 0.066(5) 0.071(5) -0.030(4) -0.021(3) 0.006(3)
C5F 0.059(4) 0.079(5) 0.050(4) -0.006(3) -0.012(3) 0.003(4)
C6F 0.042(3) 0.046(3) 0.054(4) -0.008(3) -0.006(3) 0.001(3)
C1G 0.033(3) 0.023(2) 0.045(3) 0.009(2) 0.007(2) 0.006(2)
C2G 0.047(3) 0.073(4) 0.055(4) 0.015(3) 0.013(3) 0.016(3)
C3G 0.068(5) 0.097(6) 0.080(6) 0.030(4) 0.037(4) 0.021(4)
C4G 0.038(3) 0.061(4) 0.114(7) 0.018(4) 0.026(4) 0.005(3)
C5G 0.031(3) 0.047(4) 0.092(5) 0.001(3) 0.001(3) 0.003(3)
C6G 0.030(3) 0.042(3) 0.067(4) 0.006(3) 0.001(3) 0.004(2)
C1H 0.021(2) 0.022(2) 0.040(3) 0.006(2) -0.009(2) -0.0048(19)
C2H 0.043(3) 0.029(3) 0.058(4) 0.006(3) 0.008(3) 0.007(2)
C3H 0.054(3) 0.024(3) 0.073(4) 0.009(3) -0.006(3) 0.009(3)
C4H 0.043(3) 0.031(3) 0.062(4) 0.018(3) -0.017(3) -0.005(3)
C5H 0.052(3) 0.038(3) 0.064(4) 0.016(3) 0.009(3) -0.004(3)
C6H 0.039(3) 0.031(3) 0.066(4) 0.005(3) 0.003(3) 0.006(2)
C1I 0.036(3) 0.045(3) 0.041(3) -0.004(3) 0.004(2) 0.003(2)
C2I 0.048(3) 0.047(4) 0.087(5) 0.017(3) 0.012(3) -0.004(3)
C3I 0.077(5) 0.064(4) 0.081(5) 0.020(4) 0.010(4) -0.013(4)
C4I 0.076(5) 0.090(6) 0.077(6) 0.005(4) 0.041(4) 0.007(4)
C5I 0.106(7) 0.202(11) 0.178(11) 0.120(9) 0.101(7) 0.101(7)
C6I 0.097(6) 0.166(9) 0.131(8) 0.101(7) 0.074(6) 0.089(6)
C1J 0.032(3) 0.039(3) 0.039(3) -0.005(2) -0.004(2) 0.010(2)
C2J 0.064(4) 0.037(3) 0.041(3) -0.007(3) 0.000(3) 0.022(3)
C3J 0.062(4) 0.040(3) 0.055(4) -0.016(3) 0.005(3) 0.019(3)
C4J 0.057(4) 0.031(3) 0.076(5) 0.001(3) 0.007(3) 0.013(3)
C5J 0.058(4) 0.046(3) 0.052(4) 0.015(3) -0.001(3) 0.002(3)
C6J 0.046(3) 0.035(3) 0.039(3) -0.002(2) 0.002(3) 0.002(2)
C1K 0.035(3) 0.032(3) 0.053(4) -0.011(3) -0.003(3) 0.001(2)
C2K 0.055(3) 0.036(3) 0.056(4) 0.000(3) 0.003(3) 0.005(3)
C3K 0.065(4) 0.044(4) 0.096(6) 0.014(4) 0.007(4) 0.001(3)
C4K 0.062(4) 0.032(4) 0.133(8) -0.015(4) -0.001(5) 0.000(3)
C5K 0.054(4) 0.048(4) 0.097(6) -0.029(4) -0.005(4) 0.004(3)
C6K 0.053(3) 0.038(3) 0.063(4) -0.017(3) 0.001(3) 0.001(3)
C1L 0.037(3) 0.039(3) 0.033(3) -0.009(2) -0.010(2) 0.008(2)
C2L 0.048(3) 0.053(4) 0.046(4) -0.010(3) -0.010(3) 0.006(3)
C3L 0.052(3) 0.060(4) 0.056(4) -0.017(3) -0.020(3) 0.005(3)
C4L 0.068(4) 0.070(5) 0.052(4) -0.016(3) -0.028(3) 0.031(4)
C5L 0.086(5) 0.054(4) 0.054(4) 0.003(3) -0.019(4) 0.019(4)
C6L 0.054(3) 0.039(3) 0.053(4) -0.004(3) -0.018(3) 0.011(3)
C1M 0.028(2) 0.029(3) 0.046(3) 0.003(2) -0.001(2) -0.001(2)
C2M 0.057(3) 0.037(3) 0.061(4) -0.006(3) -0.007(3) -0.006(3)
C3M 0.052(4) 0.037(3) 0.090(5) -0.011(3) -0.010(3) 0.001(3)
C4M 0.052(4) 0.032(3) 0.110(6) 0.020(4) 0.007(4) 0.005(3)
C5M 0.071(4) 0.049(4) 0.069(5) 0.018(3) 0.008(4) 0.011(3)
C6M 0.049(3) 0.033(3) 0.057(4) 0.007(3) -0.002(3) 0.000(3)
C1N 0.033(3) 0.034(3) 0.040(3) -0.005(2) -0.013(2) 0.001(2)
C2N 0.044(3) 0.047(3) 0.047(4) 0.005(3) -0.011(3) 0.005(3)
C3N 0.067(4) 0.061(4) 0.044(4) 0.004(3) -0.017(3) 0.015(3)
C4N 0.038(3) 0.076(5) 0.068(5) -0.009(4) -0.024(3) 0.009(3)
C5N 0.041(3) 0.066(4) 0.062(4) -0.003(3) -0.014(3) -0.007(3)
C6N 0.038(3) 0.053(4) 0.051(4) -0.004(3) -0.005(3) -0.010(3)
C1O 0.025(2) 0.027(3) 0.049(3) -0.004(2) -0.009(2) 0.004(2)
C2O 0.039(3) 0.046(3) 0.050(4) 0.005(3) -0.011(3) 0.007(3)
C3O 0.057(4) 0.068(4) 0.067(5) 0.003(3) -0.024(3) 0.009(3)
C4O 0.043(4) 0.065(4) 0.094(6) -0.005(4) -0.031(4) 0.010(3)
C5O 0.029(3) 0.065(4) 0.105(6) 0.005(4) -0.003(3) 0.006(3)
C6O 0.029(3) 0.056(4) 0.066(4) 0.012(3) -0.005(3) -0.001(3)
C1P 0.028(2) 0.030(3) 0.037(3) 0.002(2) 0.002(2) -0.009(2)
C2P 0.036(3) 0.044(3) 0.046(4) -0.003(3) 0.004(3) -0.004(2)
C3P 0.055(3) 0.060(4) 0.042(4) -0.003(3) -0.009(3) -0.006(3)
C4P 0.076(4) 0.056(4) 0.040(4) -0.010(3) 0.011(3) -0.008(3)
C5P 0.051(3) 0.048(3) 0.059(4) -0.010(3) 0.017(3) 0.004(3)
C6P 0.043(3) 0.035(3) 0.045(3) -0.002(3) 0.005(3) -0.002(2)
P9 0.0425(8) 0.0539(10) 0.0702(12) -0.0116(9) 0.0016(8) 0.0068(8)
F1 0.23(2) 0.067(7) 0.140(12) 0.012(7) -0.036(14) -0.068(11)
F2 0.093(10) 0.233(19) 0.057(7) -0.045(11) -0.009(6) 0.102(13)
F3 0.171(14) 0.091(10) 0.140(13) -0.008(8) 0.023(10) -0.082(10)
F4 0.063(6) 0.166(13) 0.129(12) -0.077(11) 0.026(7) 0.003(8)
F1A 0.053(6) 0.159(13) 0.171(14) 0.013(11) 0.012(7) -0.032(8)
F2A 0.256(19) 0.077(8) 0.072(8) -0.008(6) 0.033(10) 0.070(10)
F3A 0.040(5) 0.37(3) 0.30(3) 0.31(2) 0.046(10) 0.044(12)
F4A 0.130(13) 0.055(7) 0.26(2) -0.020(9) -0.018(12) 0.032(8)
F5 0.083(3) 0.118(4) 0.099(3) 0.005(3) -0.024(3) 0.002(3)
F6 0.129(4) 0.289(8) 0.077(4) -0.039(4) -0.035(3) 0.067(5)
O1S 0.112(5) 0.174(7) 0.183(8) 0.070(6) 0.023(5) 0.061(5)
C3S 0.056(5) 0.231(12) 0.083(6) -0.031(7) 0.005(4) 0.018(6)
C4S 0.057(5) 0.189(11) 0.157(10) 0.024(8) -0.008(6) 0.004(6)
C5S 0.180(11) 0.115(8) 0.095(7) -0.022(6) 0.024(7) 0.078(8)
C6S 0.142(9) 0.123(8) 0.110(8) -0.037(6) 0.010(7) 0.013(7)
C1S 0.087(5) 0.058(5) 0.151(8) 0.006(5) -0.006(5) -0.007(4)
Cl1A 0.0978(16) 0.0503(11) 0.238(3) 0.0049(15) -0.0124(18) -0.0082(11)
Cl1B 0.0982(15) 0.0769(14) 0.147(2) 0.0080(13) 0.0189(14) 0.0201(12)
C2S 0.118(8) 0.104(8) 0.054(6) 0.010(5) -0.001(6) -0.035(6)
Cl2A 0.107(2) 0.285(5) 0.073(2) -0.022(3) 0.0261(17) -0.034(3)
Cl2B 0.167(3) 0.175(3) 0.083(2) 0.003(2) -0.023(2) -0.093(3)

_geom_special_details
;
 All esds (except the esd in the dihedral angle between two l.s. planes)
 are estimated using the full covariance matrix.  The cell esds are taken
 into account individually in the estimation of esds in distances, angles
 and torsion angles; correlations between esds in cell parameters are only
 used when they are defined by crystal symmetry.  An approximate (isotropic)
 treatment of cell esds is used for estimating esds involving l.s. planes.
;

loop_
 _geom_bond_atom_site_label_1
 _geom_bond_atom_site_label_2
 _geom_bond_distance
 _geom_bond_site_symmetry_2
 _geom_bond_publ_flag
Cu1 P8 2.2483(13) . ?
Cu1 P1 2.2551(13) . ?
Cu1 S4 2.3233(13) . ?
Cu1 S1 2.5182(13) . ?
Cu1 Cu5 2.7520(8) . ?
Cu2 P2 2.2432(13) . ?
Cu2 P3 2.2482(13) . ?
Cu2 S1 2.3539(13) . ?
Cu2 S3 2.4702(14) . ?
Cu2 Cu5 2.7897(8) . ?
Cu3 P4 2.2584(14) . ?
Cu3 P5 2.2595(15) . ?
Cu3 S3 2.3362(13) . ?
Cu3 S2 2.5377(13) . ?
Cu3 Cu5 2.7472(8) . ?
Cu4 P6 2.2444(14) . ?
Cu4 P7 2.2485(13) . ?
Cu4 S2 2.3103(13) . ?
Cu4 S4 2.5685(13) . ?
Cu4 Cu5 2.7525(8) . ?
Cu5 S2 2.2721(13) . ?
Cu5 S4 2.2781(13) . ?
Cu5 S1 2.2826(14) . ?
Cu5 S3 2.2844(13) . ?
S1 C1 1.795(5) . ?
S2 C9 1.789(5) . ?
S3 C11 1.786(5) . ?
S4 C19 1.780(5) . ?
P1 C1B 1.820(5) . ?
P1 C1A 1.843(5) . ?
P1 C21 1.845(5) . ?
P2 C1C 1.821(5) . ?
P2 C21 1.832(5) . ?
P2 C1D 1.838(6) . ?
P3 C1F 1.818(5) . ?
P3 C1E 1.829(5) . ?
P3 C22 1.840(4) . ?
P4 C1G 1.826(5) . ?
P4 C22 1.838(5) . ?
P4 C1H 1.844(4) . ?
P5 C1J 1.816(5) . ?
P5 C1I 1.835(5) . ?
P5 C23 1.850(5) . ?
P6 C1K 1.832(5) . ?
P6 C23 1.838(5) . ?
P6 C1L 1.841(5) . ?
P7 C1N 1.830(5) . ?
P7 C1M 1.837(5) . ?
P7 C24 1.841(5) . ?
P8 C1O 1.821(4) . ?
P8 C1P 1.832(5) . ?
P8 C24 1.842(4) . ?
C1 C2 1.364(7) . ?
C1 C10 1.442(6) . ?
C2 C3 1.390(7) . ?
C3 C4 1.356(8) . ?
C4 C5 1.406(8) . ?
C5 C6 1.414(8) . ?
C5 C10 1.452(7) . ?
C6 C7 1.347(8) . ?
C7 C8 1.400(7) . ?
C8 C9 1.379(6) . ?
C9 C10 1.438(6) . ?
C11 C12 1.380(7) . ?
C11 C20 1.444(6) . ?
C12 C13 1.389(8) . ?
C13 C14 1.345(8) . ?
C14 C15 1.416(8) . ?
C15 C16 1.415(8) . ?
C15 C20 1.445(7) . ?
C16 C17 1.342(8) . ?
C17 C18 1.410(8) . ?
C18 C19 1.367(6) . ?
C19 C20 1.448(6) . ?
C1A C6A 1.378(7) . ?
C1A C2A 1.382(7) . ?
C2A C3A 1.372(7) . ?
C3A C4A 1.378(9) . ?
C4A C5A 1.361(9) . ?
C5A C6A 1.382(8) . ?
C1B C2B 1.386(7) . ?
C1B C6B 1.398(6) . ?
C2B C3B 1.379(7) . ?
C3B C4B 1.370(8) . ?
C4B C5B 1.374(8) . ?
C5B C6B 1.375(7) . ?
C1C C6C 1.380(7) . ?
C1C C2C 1.395(7) . ?
C2C C3C 1.384(7) . ?
C3C C4C 1.362(8) . ?
C4C C5C 1.374(8) . ?
C5C C6C 1.392(8) . ?
C1D C6D 1.362(9) . ?
C1D C2D 1.394(9) . ?
C2D C3D 1.377(10) . ?
C3D C4D 1.360(13) . ?
C4D C5D 1.368(13) . ?
C5D C6D 1.396(9) . ?
C1E C6E 1.375(7) . ?
C1E C2E 1.385(7) . ?
C2E C3E 1.386(7) . ?
C3E C4E 1.369(9) . ?
C4E C5E 1.374(9) . ?
C5E C6E 1.381(7) . ?
C1F C6F 1.378(7) . ?
C1F C2F 1.390(7) . ?
C2F C3F 1.363(8) . ?
C3F C4F 1.369(9) . ?
C4F C5F 1.377(9) . ?
C5F C6F 1.394(8) . ?
C1G C2G 1.369(7) . ?
C1G C6G 1.383(7) . ?
C2G C3G 1.398(8) . ?
C3G C4G 1.377(9) . ?
C4G C5G 1.364(9) . ?
C5G C6G 1.378(7) . ?
C1H C6H 1.379(7) . ?
C1H C2H 1.386(6) . ?
C2H C3H 1.382(7) . ?
C3H C4H 1.363(8) . ?
C4H C5H 1.376(7) . ?
C5H C6H 1.373(7) . ?
C1I C6I 1.360(8) . ?
C1I C2I 1.363(8) . ?
C2I C3I 1.383(8) . ?
C3I C4I 1.349(9) . ?
C4I C5I 1.331(10) . ?
C5I C6I 1.387(10) . ?
C1J C6J 1.367(7) . ?
C1J C2J 1.385(7) . ?
C2J C3J 1.376(7) . ?
C3J C4J 1.367(8) . ?
C4J C5J 1.365(8) . ?
C5J C6J 1.400(7) . ?
C1K C2K 1.370(7) . ?
C1K C6K 1.384(7) . ?
C2K C3K 1.394(8) . ?
C3K C4K 1.351(9) . ?
C4K C5K 1.352(9) . ?
C5K C6K 1.388(8) . ?
C1L C6L 1.370(7) . ?
C1L C2L 1.396(7) . ?
C2L C3L 1.382(7) . ?
C3L C4L 1.350(8) . ?
C4L C5L 1.391(8) . ?
C5L C6L 1.380(7) . ?
C1M C2M 1.382(7) . ?
C1M C6M 1.387(7) . ?
C2M C3M 1.389(8) . ?
C3M C4M 1.363(9) . ?
C4M C5M 1.371(9) . ?
C5M C6M 1.390(7) . ?
C1N C2N 1.370(7) . ?
C1N C6N 1.381(7) . ?
C2N C3N 1.390(7) . ?
C3N C4N 1.369(8) . ?
C4N C5N 1.371(8) . ?
C5N C6N 1.372(7) . ?
C1O C2O 1.366(7) . ?
C1O C6O 1.399(7) . ?
C2O C3O 1.379(7) . ?
C3O C4O 1.366(9) . ?
C4O C5O 1.389(9) . ?
C5O C6O 1.378(7) . ?
C1P C2P 1.383(7) . ?
C1P C6P 1.391(7) . ?
C2P C3P 1.381(7) . ?
C3P C4P 1.380(8) . ?
C4P C5P 1.378(8) . ?
C5P C6P 1.372(7) . ?
P9 F3A 1.486(8) . ?
P9 F3 1.521(7) . ?
P9 F4A 1.524(9) . ?
P9 F2 1.526(7) . ?
P9 F6 1.537(4) . ?
P9 F4 1.550(7) . ?
P9 F1 1.559(7) . ?
P9 F2A 1.558(8) . ?
P9 F5 1.566(4) . ?
P9 F1A 1.579(8) . ?
O1S C5S 1.347(5) . ?
O1S C4S 1.392(5) . ?
C3S C4S 1.525(5) . ?
C5S C6S 1.513(5) . ?
C1S Cl1A 1.725(7) . ?
C1S Cl1B 1.725(8) . ?
C2S Cl2B 1.670(9) . ?
C2S Cl2A 1.699(9) . ?

loop_
 _geom_angle_atom_site_label_1
 _geom_angle_atom_site_label_2
 _geom_angle_atom_site_label_3
 _geom_angle
 _geom_angle_site_symmetry_1
 _geom_angle_site_symmetry_3
 _geom_angle_publ_flag
P8 Cu1 P1 123.67(5) . . ?
P8 Cu1 S4 109.41(5) . . ?
P1 Cu1 S4 113.21(5) . . ?
P8 Cu1 S1 104.92(5) . . ?
P1 Cu1 S1 99.09(5) . . ?
S4 Cu1 S1 103.58(4) . . ?
P8 Cu1 Cu5 116.94(4) . . ?
P1 Cu1 Cu5 117.86(4) . . ?
S4 Cu1 Cu5 52.52(3) . . ?
S1 Cu1 Cu5 51.09(3) . . ?
P2 Cu2 P3 125.43(5) . . ?
P2 Cu2 S1 111.01(5) . . ?
P3 Cu2 S1 109.82(5) . . ?
P2 Cu2 S3 103.98(5) . . ?
P3 Cu2 S3 100.52(5) . . ?
S1 Cu2 S3 102.84(5) . . ?
P2 Cu2 Cu5 116.94(4) . . ?
P3 Cu2 Cu5 116.47(4) . . ?
S1 Cu2 Cu5 51.85(3) . . ?
S3 Cu2 Cu5 51.04(3) . . ?
P4 Cu3 P5 127.24(5) . . ?
P4 Cu3 S3 109.09(5) . . ?
P5 Cu3 S3 111.84(5) . . ?
P4 Cu3 S2 102.00(5) . . ?
P5 Cu3 S2 99.44(5) . . ?
S3 Cu3 S2 103.39(4) . . ?
P4 Cu3 Cu5 115.04(4) . . ?
P5 Cu3 Cu5 115.91(4) . . ?
S3 Cu3 Cu5 52.65(3) . . ?
S2 Cu3 Cu5 50.74(3) . . ?
P6 Cu4 P7 125.79(5) . . ?
P6 Cu4 S2 109.03(5) . . ?
P7 Cu4 S2 112.88(5) . . ?
P6 Cu4 S4 102.09(5) . . ?
P7 Cu4 S4 100.36(5) . . ?
S2 Cu4 S4 103.00(4) . . ?
P6 Cu4 Cu5 115.17(4) . . ?
P7 Cu4 Cu5 117.25(4) . . ?
S2 Cu4 Cu5 52.45(3) . . ?
S4 Cu4 Cu5 50.55(3) . . ?
S2 Cu5 S4 114.26(5) . . ?
S2 Cu5 S1 102.14(5) . . ?
S4 Cu5 S1 113.14(5) . . ?
S2 Cu5 S3 114.25(5) . . ?
S4 Cu5 S3 102.12(5) . . ?
S1 Cu5 S3 111.36(5) . . ?
S2 Cu5 Cu3 59.86(3) . . ?
S4 Cu5 Cu3 124.96(4) . . ?
S1 Cu5 Cu3 121.68(4) . . ?
S3 Cu5 Cu3 54.39(3) . . ?
S2 Cu5 Cu1 122.88(4) . . ?
S4 Cu5 Cu1 54.02(3) . . ?
S1 Cu5 Cu1 59.15(3) . . ?
S3 Cu5 Cu1 122.86(4) . . ?
Cu3 Cu5 Cu1 177.19(3) . . ?
S2 Cu5 Cu4 53.72(3) . . ?
S4 Cu5 Cu4 60.54(3) . . ?
S1 Cu5 Cu4 123.52(4) . . ?
S3 Cu5 Cu4 125.03(4) . . ?
Cu3 Cu5 Cu4 91.34(3) . . ?
Cu1 Cu5 Cu4 90.15(2) . . ?
S2 Cu5 Cu2 125.26(4) . . ?
S4 Cu5 Cu2 120.41(4) . . ?
S1 Cu5 Cu2 54.19(3) . . ?
S3 Cu5 Cu2 57.23(4) . . ?
Cu3 Cu5 Cu2 89.68(2) . . ?
Cu1 Cu5 Cu2 88.92(2) . . ?
Cu4 Cu5 Cu2 177.63(3) . . ?
C1 S1 Cu5 112.30(17) . . ?
C1 S1 Cu2 120.00(14) . . ?
Cu5 S1 Cu2 73.96(4) . . ?
C1 S1 Cu1 133.38(15) . . ?
Cu5 S1 Cu1 69.76(4) . . ?
Cu2 S1 Cu1 105.58(5) . . ?
C9 S2 Cu5 112.21(16) . . ?
C9 S2 Cu4 116.25(14) . . ?
Cu5 S2 Cu4 73.83(4) . . ?
C9 S2 Cu3 133.95(15) . . ?
Cu5 S2 Cu3 69.41(4) . . ?
Cu4 S2 Cu3 108.39(5) . . ?
C11 S3 Cu5 112.19(15) . . ?
C11 S3 Cu3 120.52(15) . . ?
Cu5 S3 Cu3 72.95(4) . . ?
C11 S3 Cu2 129.82(15) . . ?
Cu5 S3 Cu2 71.73(4) . . ?
Cu3 S3 Cu2 108.62(5) . . ?
C19 S4 Cu5 112.24(16) . . ?
C19 S4 Cu1 114.94(16) . . ?
Cu5 S4 Cu1 73.46(4) . . ?
C19 S4 Cu4 138.17(16) . . ?
Cu5 S4 Cu4 68.91(4) . . ?
Cu1 S4 Cu4 105.52(5) . . ?
C1B P1 C1A 100.9(2) . . ?
C1B P1 C21 105.9(2) . . ?
C1A P1 C21 101.5(2) . . ?
C1B P1 Cu1 117.69(16) . . ?
C1A P1 Cu1 112.93(16) . . ?
C21 P1 Cu1 115.75(15) . . ?
C1C P2 C21 102.8(2) . . ?
C1C P2 C1D 101.4(2) . . ?
C21 P2 C1D 102.7(3) . . ?
C1C P2 Cu2 120.04(18) . . ?
C21 P2 Cu2 117.12(16) . . ?
C1D P2 Cu2 110.32(16) . . ?
C1F P3 C1E 101.5(2) . . ?
C1F P3 C22 101.4(2) . . ?
C1E P3 C22 104.5(2) . . ?
C1F P3 Cu2 111.31(15) . . ?
C1E P3 Cu2 120.51(17) . . ?
C22 P3 Cu2 115.16(14) . . ?
C1G P4 C22 105.2(2) . . ?
C1G P4 C1H 101.7(2) . . ?
C22 P4 C1H 99.0(2) . . ?
C1G P4 Cu3 114.99(17) . . ?
C22 P4 Cu3 117.14(14) . . ?
C1H P4 Cu3 116.45(14) . . ?
C1J P5 C1I 102.7(2) . . ?
C1J P5 C23 106.4(2) . . ?
C1I P5 C23 100.0(2) . . ?
C1J P5 Cu3 114.61(17) . . ?
C1I P5 Cu3 114.96(17) . . ?
C23 P5 Cu3 116.32(16) . . ?
C1K P6 C23 103.6(2) . . ?
C1K P6 C1L 104.4(2) . . ?
C23 P6 C1L 99.9(2) . . ?
C1K P6 Cu4 116.82(19) . . ?
C23 P6 Cu4 117.57(17) . . ?
C1L P6 Cu4 112.47(16) . . ?
C1N P7 C1M 99.0(2) . . ?
C1N P7 C24 105.3(2) . . ?
C1M P7 C24 102.9(2) . . ?
C1N P7 Cu4 118.39(18) . . ?
C1M P7 Cu4 111.44(15) . . ?
C24 P7 Cu4 117.21(15) . . ?
C1O P8 C1P 103.5(2) . . ?
C1O P8 C24 103.6(2) . . ?
C1P P8 C24 102.1(2) . . ?
C1O P8 Cu1 116.74(17) . . ?
C1P P8 Cu1 111.11(15) . . ?
C24 P8 Cu1 117.92(15) . . ?
C2 C1 C10 120.1(4) . . ?
C2 C1 S1 111.0(4) . . ?
C10 C1 S1 128.3(4) . . ?
C1 C2 C3 123.2(5) . . ?
C4 C3 C2 119.3(5) . . ?
C3 C4 C5 120.6(5) . . ?
C4 C5 C6 117.5(5) . . ?
C4 C5 C10 121.3(5) . . ?
C6 C5 C10 121.1(5) . . ?
C7 C6 C5 121.1(5) . . ?
C6 C7 C8 119.0(5) . . ?
C9 C8 C7 122.9(5) . . ?
C8 C9 C10 119.9(5) . . ?
C8 C9 S2 110.9(4) . . ?
C10 C9 S2 128.7(4) . . ?
C9 C10 C1 129.4(4) . . ?
C9 C10 C5 115.4(4) . . ?
C1 C10 C5 115.2(4) . . ?
C12 C11 C20 119.7(4) . . ?
C12 C11 S3 110.9(4) . . ?
C20 C11 S3 128.8(3) . . ?
C11 C12 C13 122.8(5) . . ?
C14 C13 C12 120.0(6) . . ?
C13 C14 C15 120.1(5) . . ?
C16 C15 C14 117.3(5) . . ?
C16 C15 C20 121.0(5) . . ?
C14 C15 C20 121.7(5) . . ?
C17 C16 C15 121.2(5) . . ?
C16 C17 C18 118.8(6) . . ?
C19 C18 C17 123.3(5) . . ?
C18 C19 C20 119.5(4) . . ?
C18 C19 S4 111.6(4) . . ?
C20 C19 S4 128.6(3) . . ?
C11 C20 C15 115.2(4) . . ?
C11 C20 C19 129.0(4) . . ?
C15 C20 C19 115.8(4) . . ?
P2 C21 P1 116.4(3) . . ?
P4 C22 P3 118.5(2) . . ?
P6 C23 P5 118.9(3) . . ?
P7 C24 P8 116.4(2) . . ?
C6A C1A C2A 118.4(5) . . ?
C6A C1A P1 124.0(4) . . ?
C2A C1A P1 117.6(4) . . ?
C3A C2A C1A 121.2(6) . . ?
C2A C3A C4A 119.5(6) . . ?
C5A C4A C3A 120.3(6) . . ?
C4A C5A C6A 120.0(6) . . ?
C1A C6A C5A 120.6(6) . . ?
C2B C1B C6B 119.3(5) . . ?
C2B C1B P1 118.7(4) . . ?
C6B C1B P1 122.0(4) . . ?
C3B C2B C1B 119.6(5) . . ?
C4B C3B C2B 120.5(6) . . ?
C3B C4B C5B 120.7(5) . . ?
C4B C5B C6B 119.6(5) . . ?
C5B C6B C1B 120.3(5) . . ?
C6C C1C C2C 118.3(5) . . ?
C6C C1C P2 119.4(4) . . ?
C2C C1C P2 122.3(4) . . ?
C3C C2C C1C 120.8(6) . . ?
C4C C3C C2C 119.9(6) . . ?
C3C C4C C5C 120.5(6) . . ?
C4C C5C C6C 119.9(6) . . ?
C1C C6C C5C 120.5(5) . . ?
C6D C1D C2D 118.2(6) . . ?
C6D C1D P2 124.8(5) . . ?
C2D C1D P2 116.9(5) . . ?
C3D C2D C1D 120.6(9) . . ?
C4D C3D C2D 120.4(9) . . ?
C3D C4D C5D 120.2(8) . . ?
C4D C5D C6D 119.4(9) . . ?
C1D C6D C5D 121.2(8) . . ?
C6E C1E C2E 118.7(5) . . ?
C6E C1E P3 119.7(4) . . ?
C2E C1E P3 121.5(4) . . ?
C1E C2E C3E 121.4(6) . . ?
C4E C3E C2E 118.8(6) . . ?
C3E C4E C5E 120.5(5) . . ?
C4E C5E C6E 120.4(6) . . ?
C1E C6E C5E 120.2(6) . . ?
C6F C1F C2F 117.7(5) . . ?
C6F C1F P3 124.5(4) . . ?
C2F C1F P3 117.7(4) . . ?
C3F C2F C1F 121.8(6) . . ?
C2F C3F C4F 120.5(6) . . ?
C3F C4F C5F 119.0(6) . . ?
C4F C5F C6F 120.5(6) . . ?
C1F C6F C5F 120.4(6) . . ?
C2G C1G C6G 119.2(5) . . ?
C2G C1G P4 118.5(4) . . ?
C6G C1G P4 122.2(4) . . ?
C1G C2G C3G 120.3(6) . . ?
C4G C3G C2G 119.4(7) . . ?
C5G C4G C3G 120.5(6) . . ?
C4G C5G C6G 119.9(6) . . ?
C5G C6G C1G 120.7(6) . . ?
C6H C1H C2H 117.6(4) . . ?
C6H C1H P4 121.2(3) . . ?
C2H C1H P4 121.1(4) . . ?
C3H C2H C1H 120.9(5) . . ?
C4H C3H C2H 120.4(5) . . ?
C3H C4H C5H 119.5(5) . . ?
C6H C5H C4H 120.1(5) . . ?
C5H C6H C1H 121.5(5) . . ?
C6I C1I C2I 115.8(5) . . ?
C6I C1I P5 121.7(5) . . ?
C2I C1I P5 122.5(4) . . ?
C1I C2I C3I 122.4(6) . . ?
C4I C3I C2I 120.4(6) . . ?
C5I C4I C3I 118.2(7) . . ?
C4I C5I C6I 121.6(7) . . ?
C1I C6I C5I 121.5(7) . . ?
C6J C1J C2J 119.2(5) . . ?
C6J C1J P5 117.8(4) . . ?
C2J C1J P5 122.9(4) . . ?
C3J C2J C1J 120.3(5) . . ?
C4J C3J C2J 120.2(5) . . ?
C5J C4J C3J 120.6(5) . . ?
C4J C5J C6J 119.3(5) . . ?
C1J C6J C5J 120.4(5) . . ?
C2K C1K C6K 119.2(5) . . ?
C2K C1K P6 118.7(4) . . ?
C6K C1K P6 122.1(4) . . ?
C1K C2K C3K 120.1(6) . . ?
C4K C3K C2K 119.8(7) . . ?
C3K C4K C5K 121.0(6) . . ?
C4K C5K C6K 120.2(7) . . ?
C1K C6K C5K 119.7(6) . . ?
C6L C1L C2L 118.7(5) . . ?
C6L C1L P6 120.8(4) . . ?
C2L C1L P6 120.2(4) . . ?
C3L C2L C1L 119.8(6) . . ?
C4L C3L C2L 121.0(6) . . ?
C3L C4L C5L 120.0(6) . . ?
C6L C5L C4L 119.2(6) . . ?
C1L C6L C5L 121.3(6) . . ?
C2M C1M C6M 119.2(5) . . ?
C2M C1M P7 117.6(4) . . ?
C6M C1M P7 123.2(4) . . ?
C1M C2M C3M 120.8(6) . . ?
C4M C3M C2M 119.2(6) . . ?
C3M C4M C5M 121.2(6) . . ?
C4M C5M C6M 119.7(6) . . ?
C1M C6M C5M 119.9(6) . . ?
C2N C1N C6N 118.8(5) . . ?
C2N C1N P7 119.0(4) . . ?
C6N C1N P7 122.1(4) . . ?
C1N C2N C3N 120.4(5) . . ?
C4N C3N C2N 119.7(6) . . ?
C3N C4N C5N 120.1(5) . . ?
C4N C5N C6N 119.8(6) . . ?
C5N C6N C1N 120.9(6) . . ?
C2O C1O C6O 119.0(5) . . ?
C2O C1O P8 119.1(4) . . ?
C6O C1O P8 122.0(4) . . ?
C1O C2O C3O 121.2(5) . . ?
C4O C3O C2O 119.7(6) . . ?
C3O C4O C5O 120.4(6) . . ?
C6O C5O C4O 119.5(6) . . ?
C5O C6O C1O 120.1(6) . . ?
C2P C1P C6P 118.8(5) . . ?
C2P C1P P8 120.7(4) . . ?
C6P C1P P8 120.1(4) . . ?
C3P C2P C1P 120.2(5) . . ?
C4P C3P C2P 120.8(6) . . ?
C5P C4P C3P 119.0(6) . . ?
C6P C5P C4P 120.6(5) . . ?
C5P C6P C1P 120.6(5) . . ?
F3A P9 F3 134.3(10) . . ?
F3A P9 F4A 95.3(10) . . ?
F3 P9 F4A 129.4(8) . . ?
F3A P9 F2 133.6(10) . . ?
F3 P9 F2 91.9(6) . . ?
F4A P9 F2 38.5(7) . . ?
F3A P9 F6 89.6(8) . . ?
F3 P9 F6 86.1(5) . . ?
F4A P9 F6 84.6(8) . . ?
F2 P9 F6 89.3(4) . . ?
F3A P9 F4 44.3(9) . . ?
F3 P9 F4 90.1(6) . . ?
F4A P9 F4 138.8(8) . . ?
F2 P9 F4 176.0(6) . . ?
F6 P9 F4 87.3(5) . . ?
F3A P9 F1 43.5(9) . . ?
F3 P9 F1 177.8(7) . . ?
F4A P9 F1 52.7(6) . . ?
F2 P9 F1 90.3(6) . . ?
F6 P9 F1 93.6(5) . . ?
F4 P9 F1 87.7(6) . . ?
F3A P9 F2A 92.9(9) . . ?
F3 P9 F2A 43.8(6) . . ?
F4A P9 F2A 170.6(8) . . ?
F2 P9 F2A 132.9(8) . . ?
F6 P9 F2A 100.2(6) . . ?
F4 P9 F2A 50.1(6) . . ?
F1 P9 F2A 134.2(8) . . ?
F3A P9 F5 90.5(8) . . ?
F3 P9 F5 94.3(5) . . ?
F4A P9 F5 94.7(8) . . ?
F2 P9 F5 90.1(4) . . ?
F6 P9 F5 179.3(3) . . ?
F4 P9 F5 93.3(5) . . ?
F1 P9 F5 85.9(4) . . ?
F2A P9 F5 80.6(6) . . ?
F3A P9 F1A 172.9(8) . . ?
F3 P9 F1A 46.4(6) . . ?
F4A P9 F1A 85.9(8) . . ?
F2 P9 F1A 47.4(6) . . ?
F6 P9 F1A 97.5(5) . . ?
F4 P9 F1A 135.2(7) . . ?
F1 P9 F1A 135.8(7) . . ?
F2A P9 F1A 85.5(7) . . ?
F5 P9 F1A 82.4(5) . . ?
C5S O1S C4S 117.7(8) . . ?
O1S C4S C3S 111.4(5) . . ?
O1S C5S C6S 114.3(5) . . ?
Cl1A C1S Cl1B 114.5(4) . . ?
Cl2B C2S Cl2A 112.9(5) . . ?

_diffrn_measured_fraction_theta_max    0.998
_diffrn_reflns_theta_full              25.00
_diffrn_measured_fraction_theta_full   0.998
_refine_diff_density_max    0.642
_refine_diff_density_min   -0.644
_refine_diff_density_rms    0.084

#===END

data_2201

_audit_creation_method            SHELXL-97
_chemical_name_systematic
;
 ?
;
_chemical_name_common             1�1.5CH2Cl2
_chemical_melting_point           ?
_chemical_formula_moiety          ?
_chemical_formula_sum
 'C96.50 H81 Cl3 Cu4 P6 S4'
_chemical_formula_weight          1915.18

loop_
 _atom_type_symbol
 _atom_type_description
 _atom_type_scat_dispersion_real
 _atom_type_scat_dispersion_imag
 _atom_type_scat_source
 'C'  'C'   0.0033   0.0016
 'International Tables Vol C Tables 4.2.6.8 and 6.1.1.4'
 'H'  'H'   0.0000   0.0000
 'International Tables Vol C Tables 4.2.6.8 and 6.1.1.4'
 'P'  'P'   0.1023   0.0942
 'International Tables Vol C Tables 4.2.6.8 and 6.1.1.4'
 'S'  'S'   0.1246   0.1234
 'International Tables Vol C Tables 4.2.6.8 and 6.1.1.4'
 'Cu'  'Cu'   0.3201   1.2651
 'International Tables Vol C Tables 4.2.6.8 and 6.1.1.4'
 'Cl'  'Cl'   0.1484   0.1585
 'International Tables Vol C Tables 4.2.6.8 and 6.1.1.4'

_symmetry_cell_setting            Monoclinic
_symmetry_space_group_name_H-M    P2(1)/n

loop_
 _symmetry_equiv_pos_as_xyz
 'x, y, z'
 '-x+1/2, y+1/2, -z+1/2'
 '-x, -y, -z'
 'x-1/2, -y-1/2, z-1/2'

_cell_length_a                    23.4692(8)
_cell_length_b                    22.9887(8)
_cell_length_c                    32.0613(10)
_cell_angle_alpha                 90.00
_cell_angle_beta                  91.4070(10)
_cell_angle_gamma                 90.00
_cell_volume                      17292.7(10)
_cell_formula_units_Z             8
_cell_measurement_temperature     223(2)
_cell_measurement_reflns_used     3142
_cell_measurement_theta_min       2.18
_cell_measurement_theta_max       17.74

_exptl_crystal_description        Block
_exptl_crystal_colour             Orange
_exptl_crystal_size_max           0.40
_exptl_crystal_size_mid           0.38
_exptl_crystal_size_min           0.30
_exptl_crystal_density_meas       0
_exptl_crystal_density_diffrn     1.471
_exptl_crystal_density_method     'not measured'
_exptl_crystal_F_000              7848
_exptl_absorpt_coefficient_mu     1.319
_exptl_absorpt_correction_type    'Sadabs, (Sheldrick 2001)'
_exptl_absorpt_correction_T_min   0.6206
_exptl_absorpt_correction_T_max   0.6931
_exptl_absorpt_process_details    ?

_exptl_special_details
;
 ?
;

_diffrn_ambient_temperature       223(2)
_diffrn_radiation_wavelength      0.71073
_diffrn_radiation_type            MoK\a
_diffrn_radiation_source          'fine-focus sealed tube'
_diffrn_radiation_monochromator   graphite
_diffrn_measurement_device_type   'CCD area detector'
_diffrn_measurement_method        'phi and omega scans'
_diffrn_detector_area_resol_mean  ?
_diffrn_standards_number          ?
_diffrn_standards_interval_count  ?
_diffrn_standards_interval_time   ?
_diffrn_standards_decay_%         ?
_diffrn_reflns_number             100198
_diffrn_reflns_av_R_equivalents   0.1502
_diffrn_reflns_av_sigmaI/netI     0.1687
_diffrn_reflns_limit_h_min        -27
_diffrn_reflns_limit_h_max        25
_diffrn_reflns_limit_k_min        -27
_diffrn_reflns_limit_k_max        23
_diffrn_reflns_limit_l_min        -33
_diffrn_reflns_limit_l_max        38
_diffrn_reflns_theta_min          1.09
_diffrn_reflns_theta_max          25.00
_reflns_number_total              30419
_reflns_number_gt                 15888
_reflns_threshold_expression      >2sigma(I)

_computing_data_collection        'Bruker SMART'
_computing_cell_refinement        'Bruker SMART'
_computing_data_reduction         'Bruker SAINT'
_computing_structure_solution     'SHELXS-97 (Sheldrick, 1990)'
_computing_structure_refinement   'SHELXL-97 (Sheldrick, 1997)'
_computing_molecular_graphics     'Bruker SHELXTL'
_computing_publication_material   'Bruker SHELXTL'

_refine_special_details
;
 Refinement of F^2^ against ALL reflections.  The weighted R-factor wR and
 goodness of fit S are based on F^2^, conventional R-factors R are based
 on F, with F set to zero for negative F^2^. The threshold expression of
 F^2^ > 2sigma(F^2^) is used only for calculating R-factors(gt) etc. and is
 not relevant to the choice of reflections for refinement.  R-factors based
 on F^2^ are statistically about twice as large as those based on F, and R-
 factors based on ALL data will be even larger.
;

_refine_ls_structure_factor_coef  Fsqd
_refine_ls_matrix_type            full
_refine_ls_weighting_scheme       calc
_refine_ls_weighting_details
 'calc w=1/[\s^2^(Fo^2^)+(0.0694P)^2^+0.0000P] where P=(Fo^2^+2Fc^2^)/3'
_atom_sites_solution_primary      direct
_atom_sites_solution_secondary    difmap
_atom_sites_solution_hydrogens    geom
_refine_ls_hydrogen_treatment     mixed
_refine_ls_extinction_method      none
_refine_ls_extinction_coef        ?
_refine_ls_number_reflns          30419
_refine_ls_number_parameters      1957
_refine_ls_number_restraints      6
_refine_ls_R_factor_all           0.1551
_refine_ls_R_factor_gt            0.0736
_refine_ls_wR_factor_ref          0.1899
_refine_ls_wR_factor_gt           0.1598
_refine_ls_goodness_of_fit_ref    0.976
_refine_ls_restrained_S_all       0.977
_refine_ls_shift/su_max           0.003
_refine_ls_shift/su_mean          0.000

loop_
 _atom_site_label
 _atom_site_type_symbol
 _atom_site_fract_x
 _atom_site_fract_y
 _atom_site_fract_z
 _atom_site_U_iso_or_equiv
 _atom_site_adp_type
 _atom_site_occupancy
 _atom_site_symmetry_multiplicity
 _atom_site_calc_flag
 _atom_site_refinement_flags
 _atom_site_disorder_assembly
 _atom_site_disorder_group
Cu1 Cu 0.70699(4) 0.40970(4) 0.14194(3) 0.0297(2) Uani 1 1 d . A .
Cu2 Cu 0.72185(4) 0.40739(4) 0.04696(3) 0.0297(2) Uani 1 1 d . A .
Cu3 Cu 0.73768(4) 0.56693(4) 0.06003(3) 0.0339(2) Uani 1 1 d . A .
Cu4 Cu 0.72034(4) 0.55411(4) 0.14058(3) 0.0334(2) Uani 1 1 d . A .
Cu5 Cu 0.20748(4) 0.88965(4) 0.06690(3) 0.0286(2) Uani 1 1 d . B .
Cu6 Cu 0.28805(4) 0.99371(4) 0.05968(3) 0.0292(2) Uani 1 1 d . B .
Cu7 Cu 0.22143(4) 1.05616(4) 0.14200(3) 0.0353(2) Uani 1 1 d . B .
Cu8 Cu 0.14612(4) 0.97418(4) 0.15283(3) 0.0376(3) Uani 1 1 d . B .
P1 P 0.72929(9) 0.41609(9) 0.21153(6) 0.0300(5) Uani 1 1 d . . .
P2 P 0.61082(8) 0.40550(9) 0.13257(6) 0.0303(5) Uani 1 1 d . . .
P3 P 0.62557(8) 0.40029(9) 0.03767(6) 0.0316(5) Uani 1 1 d . . .
P4 P 0.75851(8) 0.42804(8) -0.01699(6) 0.0274(5) Uani 1 1 d . . .
P5 P 0.74979(9) 0.56479(9) -0.00744(6) 0.0300(5) Uani 1 1 d . . .
P6 P 0.71799(9) 0.54926(9) 0.20861(6) 0.0310(5) Uani 1 1 d . . .
P7 P 0.15422(8) 0.81686(9) 0.09571(6) 0.0288(5) Uani 1 1 d . . .
P8 P 0.15505(8) 0.92592(9) 0.01194(6) 0.0290(5) Uani 1 1 d . . .
P9 P 0.23293(8) 1.03247(9) 0.00716(6) 0.0293(5) Uani 1 1 d . . .
P10 P 0.35931(8) 1.05865(9) 0.07338(6) 0.0292(5) Uani 1 1 d . . .
P11 P 0.29016(9) 1.12043(9) 0.14071(6) 0.0335(5) Uani 1 1 d . . .
P12 P 0.08858(8) 0.89969(9) 0.15623(6) 0.0318(5) Uani 1 1 d . . .
S1 S 0.74808(8) 0.33826(8) 0.09823(6) 0.0331(5) Uani 1 1 d . . .
S2 S 0.75586(8) 0.47602(8) 0.09783(5) 0.0279(4) Uani 1 1 d . . .
S3 S 0.77394(9) 0.63296(9) 0.11022(6) 0.0360(5) Uani 1 1 d . . .
S4 S 0.64878(8) 0.57190(9) 0.09002(6) 0.0326(5) Uani 1 1 d . . .
S5 S 0.30398(8) 0.89367(8) 0.04727(6) 0.0308(5) Uani 1 1 d . . .
S6 S 0.23790(8) 0.95810(8) 0.11893(5) 0.0272(4) Uani 1 1 d . . .
S7 S 0.17671(9) 1.03594(9) 0.20775(6) 0.0387(5) Uani 1 1 d . . .
S8 S 0.13060(9) 1.05494(9) 0.11068(6) 0.0374(5) Uani 1 1 d . . .
C1 C 0.8215(3) 0.3480(4) 0.1097(2) 0.037(2) Uani 1 1 d . A .
C2 C 0.8498(4) 0.2968(4) 0.1198(2) 0.054(2) Uani 1 1 d . . .
H2 H 0.8288 0.2620 0.1211 0.064 Uiso 1 1 calc R A .
C3 C 0.9076(4) 0.2951(5) 0.1282(3) 0.066(3) Uani 1 1 d . A .
H3 H 0.9249 0.2597 0.1359 0.079 Uiso 1 1 calc R . .
C4 C 0.9395(4) 0.3429(5) 0.1254(3) 0.059(3) Uani 1 1 d . . .
H4 H 0.9793 0.3404 0.1295 0.071 Uiso 1 1 calc R A .
C5 C 0.9142(3) 0.3976(4) 0.1163(2) 0.046(2) Uani 1 1 d . A .
C6 C 0.9476(4) 0.4468(5) 0.1154(2) 0.052(3) Uani 1 1 d . . .
H6 H 0.9874 0.4431 0.1185 0.063 Uiso 1 1 calc R A .
C7 C 0.9245(4) 0.5012(4) 0.1101(2) 0.048(2) Uani 1 1 d . A .
H7 H 0.9480 0.5343 0.1103 0.057 Uiso 1 1 calc R . .
C8 C 0.8661(3) 0.5068(4) 0.1045(2) 0.038(2) Uani 1 1 d . . .
H8 H 0.8506 0.5442 0.1007 0.046 Uiso 1 1 calc R A .
C9 C 0.8297(3) 0.4593(3) 0.1045(2) 0.0289(18) Uani 1 1 d . A .
C10 C 0.8536(3) 0.4016(4) 0.1097(2) 0.037(2) Uani 1 1 d . . .
C11 C 0.7267(4) 0.6924(3) 0.1150(2) 0.037(2) Uani 1 1 d . A .
C12 C 0.7548(4) 0.7426(4) 0.1273(3) 0.059(3) Uani 1 1 d . . .
H12 H 0.7946 0.7417 0.1315 0.071 Uiso 1 1 calc R A .
C13 C 0.7255(5) 0.7953(4) 0.1337(3) 0.076(3) Uani 1 1 d . A .
H13 H 0.7456 0.8290 0.1418 0.092 Uiso 1 1 calc R . .
C14 C 0.6692(5) 0.7968(4) 0.1281(3) 0.075(3) Uani 1 1 d . . .
H14 H 0.6499 0.8322 0.1316 0.089 Uiso 1 1 calc R A .
C15 C 0.6384(4) 0.7478(4) 0.1172(3) 0.053(2) Uani 1 1 d . A .
C16 C 0.5784(5) 0.7532(4) 0.1138(3) 0.067(3) Uani 1 1 d . . .
H16 H 0.5611 0.7889 0.1201 0.081 Uiso 1 1 calc R A .
C17 C 0.5457(5) 0.7074(5) 0.1016(4) 0.090(4) Uani 1 1 d . A .
H17 H 0.5061 0.7117 0.0976 0.108 Uiso 1 1 calc R . .
C18 C 0.5719(4) 0.6536(4) 0.0952(3) 0.068(3) Uani 1 1 d . . .
H18 H 0.5487 0.6215 0.0882 0.081 Uiso 1 1 calc R A .
C19 C 0.6297(4) 0.6454(4) 0.0987(2) 0.039(2) Uani 1 1 d . A .
C20 C 0.6661(3) 0.6933(3) 0.1104(2) 0.0345(19) Uani 1 1 d . . .
C21 C 0.6958(3) 0.4811(3) 0.2335(2) 0.0326(19) Uani 1 1 d . A .
H21A H 0.7054 0.4831 0.2633 0.039 Uiso 1 1 calc R . .
H21B H 0.6543 0.4773 0.2304 0.039 Uiso 1 1 calc R . .
C22 C 0.5844(3) 0.4295(3) 0.0809(2) 0.0314(18) Uani 1 1 d . A .
H22A H 0.5445 0.4175 0.0772 0.038 Uiso 1 1 calc R . .
H22B H 0.5855 0.4721 0.0798 0.038 Uiso 1 1 calc R . .
C23 C 0.7334(3) 0.4989(3) -0.0372(2) 0.0304(18) Uani 1 1 d . A .
H23A H 0.7490 0.5039 -0.0651 0.036 Uiso 1 1 calc R . .
H23B H 0.6919 0.4967 -0.0407 0.036 Uiso 1 1 calc R . .
C24 C 0.3462(3) 0.8736(3) 0.0914(2) 0.0320(19) Uani 1 1 d . B .
C25 C 0.3957(4) 0.8446(3) 0.0820(3) 0.047(2) Uani 1 1 d . . .
H25 H 0.4049 0.8408 0.0538 0.057 Uiso 1 1 calc R . .
C26 C 0.4327(4) 0.8207(4) 0.1119(3) 0.059(3) Uani 1 1 d . . .
H26 H 0.4666 0.8024 0.1040 0.071 Uiso 1 1 calc R . .
C27 C 0.4189(4) 0.8243(4) 0.1532(3) 0.056(3) Uani 1 1 d . . .
H27 H 0.4421 0.8058 0.1735 0.067 Uiso 1 1 calc R . .
C28 C 0.3704(4) 0.8553(3) 0.1653(3) 0.043(2) Uani 1 1 d . B .
C29 C 0.3589(4) 0.8599(4) 0.2080(3) 0.052(2) Uani 1 1 d . . .
H29 H 0.3823 0.8403 0.2276 0.062 Uiso 1 1 calc R . .
C30 C 0.3145(4) 0.8922(4) 0.2215(2) 0.052(2) Uani 1 1 d . B .
H30 H 0.3074 0.8948 0.2502 0.063 Uiso 1 1 calc R . .
C31 C 0.2797(3) 0.9212(3) 0.1929(2) 0.041(2) Uani 1 1 d . . .
H31 H 0.2499 0.9445 0.2026 0.049 Uiso 1 1 calc R B .
C32 C 0.2875(3) 0.9167(3) 0.1507(2) 0.0297(18) Uani 1 1 d . B .
C33 C 0.3328(3) 0.8822(3) 0.1347(2) 0.0337(19) Uani 1 1 d . . .
C34 C 0.1310(4) 1.0955(4) 0.2132(3) 0.050(2) Uani 1 1 d . B .
C35 C 0.1295(5) 1.1175(5) 0.2535(3) 0.092(4) Uani 1 1 d . . .
H35 H 0.1521 1.0991 0.2742 0.110 Uiso 1 1 calc R B .
C36 C 0.0965(6) 1.1653(6) 0.2654(4) 0.118(6) Uani 1 1 d . B .
H36 H 0.0971 1.1783 0.2932 0.141 Uiso 1 1 calc R . .
C37 C 0.0644(5) 1.1921(6) 0.2365(4) 0.108(5) Uani 1 1 d . . .
H37 H 0.0416 1.2237 0.2443 0.130 Uiso 1 1 calc R B .
C38 C 0.0635(4) 1.1741(5) 0.1938(3) 0.067(3) Uani 1 1 d . B .
C39 C 0.0299(5) 1.2045(6) 0.1658(3) 0.098(4) Uani 1 1 d . . .
H39 H 0.0098 1.2374 0.1746 0.118 Uiso 1 1 calc R B .
C40 C 0.0255(6) 1.1873(6) 0.1255(3) 0.118(6) Uani 1 1 d . B .
H40 H 0.0013 1.2076 0.1068 0.141 Uiso 1 1 calc R . .
C41 C 0.0568(5) 1.1398(5) 0.1115(3) 0.080(4) Uani 1 1 d . . .
H41 H 0.0533 1.1288 0.0833 0.096 Uiso 1 1 calc R B .
C42 C 0.0920(4) 1.1090(4) 0.1371(2) 0.047(2) Uani 1 1 d . B .
C43 C 0.0965(4) 1.1240(4) 0.1812(3) 0.048(2) Uani 1 1 d . . .
C44 C 0.0858(3) 0.8441(3) 0.1151(2) 0.0320(19) Uani 1 1 d . . .
H44A H 0.0640 0.8601 0.0913 0.038 Uiso 1 1 calc R . .
H44B H 0.0644 0.8108 0.1255 0.038 Uiso 1 1 calc R . .
C45 C 0.1603(3) 1.0049(3) 0.0053(2) 0.0275(18) Uani 1 1 d . . .
H45A H 0.1424 1.0155 -0.0215 0.033 Uiso 1 1 calc R . .
H45B H 0.1387 1.0239 0.0273 0.033 Uiso 1 1 calc R . .
C46 C 0.3316(3) 1.1284(3) 0.0930(2) 0.0317(18) Uani 1 1 d . B .
H46A H 0.3637 1.1547 0.0988 0.038 Uiso 1 1 calc R . .
H46B H 0.3074 1.1463 0.0713 0.038 Uiso 1 1 calc R . .
C1A C 0.7989(2) 0.4112(3) 0.23557(16) 0.031(7) Uiso 0.60 1 d PG A 1
C2A C 0.8425(3) 0.3871(3) 0.21254(14) 0.044(4) Uiso 0.60 1 d PG A 1
H2A H 0.8357 0.3766 0.1845 0.052 Uiso 0.60 1 calc PR A 1
C3A C 0.8961(2) 0.3788(3) 0.2309(2) 0.050(4) Uiso 0.60 1 d PG A 1
H3A H 0.9256 0.3625 0.2153 0.060 Uiso 0.60 1 calc PR A 1
C4A C 0.9062(2) 0.3944(3) 0.2723(2) 0.047(4) Uiso 0.60 1 d PG A 1
H4A H 0.9425 0.3888 0.2847 0.056 Uiso 0.60 1 calc PR A 1
C5A C 0.8627(3) 0.4184(3) 0.29535(13) 0.034(3) Uiso 0.60 1 d PG A 1
H5A H 0.8695 0.4290 0.3233 0.041 Uiso 0.60 1 calc PR A 1
C6A C 0.8090(2) 0.4268(3) 0.27698(15) 0.032(3) Uiso 0.60 1 d PG A 1
H6A H 0.7796 0.4431 0.2926 0.038 Uiso 0.60 1 calc PR A 1
C101 C 0.8038(2) 0.4178(3) 0.23538(15) 0.029(11) Uiso 0.40 1 d PG A 2
C102 C 0.8464(3) 0.4415(3) 0.21136(16) 0.045(5) Uiso 0.40 1 d PG A 2
H102 H 0.8372 0.4585 0.1854 0.054 Uiso 0.40 1 calc PR A 2
C103 C 0.9028(3) 0.4402(4) 0.2257(2) 0.049(6) Uiso 0.40 1 d PG A 2
H103 H 0.9316 0.4562 0.2095 0.059 Uiso 0.40 1 calc PR A 2
C104 C 0.9165(2) 0.4151(4) 0.2641(2) 0.052(6) Uiso 0.40 1 d PG A 2
H104 H 0.9546 0.4142 0.2739 0.063 Uiso 0.40 1 calc PR A 2
C105 C 0.8738(3) 0.3914(3) 0.28816(15) 0.066(7) Uiso 0.40 1 d PG A 2
H105 H 0.8830 0.3744 0.3141 0.079 Uiso 0.40 1 calc PR A 2
C106 C 0.8174(2) 0.3927(3) 0.27379(15) 0.047(6) Uiso 0.40 1 d PG A 2
H106 H 0.7886 0.3767 0.2900 0.057 Uiso 0.40 1 calc PR A 2
C1B C 0.6969(3) 0.3551(3) 0.2389(2) 0.0327(19) Uani 1 1 d . A .
C2B C 0.7195(4) 0.3007(4) 0.2333(3) 0.053(2) Uani 1 1 d . . .
H2B H 0.7520 0.2966 0.2170 0.063 Uiso 1 1 calc R A .
C3B C 0.6959(5) 0.2522(4) 0.2508(3) 0.067(3) Uani 1 1 d . A .
H3B H 0.7120 0.2155 0.2458 0.081 Uiso 1 1 calc R . .
C4B C 0.6498(5) 0.2565(5) 0.2751(3) 0.068(3) Uani 1 1 d . . .
H4B H 0.6331 0.2229 0.2862 0.082 Uiso 1 1 calc R A .
C5B C 0.6285(5) 0.3085(5) 0.2829(3) 0.078(3) Uani 1 1 d . A .
H5B H 0.5979 0.3120 0.3011 0.093 Uiso 1 1 calc R . .
C6B C 0.6511(4) 0.3584(4) 0.2645(3) 0.059(3) Uani 1 1 d . . .
H6B H 0.6345 0.3948 0.2698 0.071 Uiso 1 1 calc R A .
C1C C 0.5643(3) 0.4470(4) 0.1677(2) 0.0343(19) Uani 1 1 d . A .
C2C C 0.5379(4) 0.4199(4) 0.2000(3) 0.071(3) Uani 1 1 d . . .
H2C H 0.5413 0.3794 0.2033 0.085 Uiso 1 1 calc R A .
C3C C 0.5061(5) 0.4519(5) 0.2279(4) 0.091(4) Uani 1 1 d . A .
H3C H 0.4893 0.4332 0.2506 0.109 Uiso 1 1 calc R . .
C4C C 0.4992(4) 0.5090(5) 0.2225(3) 0.071(3) Uani 1 1 d . . .
H4C H 0.4773 0.5304 0.2413 0.085 Uiso 1 1 calc R A .
C5C C 0.5236(4) 0.5363(4) 0.1902(3) 0.060(3) Uani 1 1 d . A .
H5C H 0.5176 0.5764 0.1862 0.072 Uiso 1 1 calc R . .
C6C C 0.5573(4) 0.5059(4) 0.1631(3) 0.047(2) Uani 1 1 d . . .
H6C H 0.5755 0.5255 0.1414 0.056 Uiso 1 1 calc R A .
C1D C 0.5825(3) 0.3316(3) 0.1373(2) 0.0348(19) Uani 1 1 d . A .
C2D C 0.6181(4) 0.2894(4) 0.1522(3) 0.055(3) Uani 1 1 d . . .
H2D H 0.6566 0.2980 0.1583 0.066 Uiso 1 1 calc R A .
C3D C 0.5973(5) 0.2337(4) 0.1585(4) 0.082(3) Uani 1 1 d . A .
H3D H 0.6217 0.2049 0.1696 0.098 Uiso 1 1 calc R . .
C4D C 0.5423(5) 0.2199(5) 0.1488(3) 0.075(3) Uani 1 1 d . . .
H4D H 0.5291 0.1817 0.1523 0.090 Uiso 1 1 calc R A .
C5D C 0.5063(4) 0.2621(5) 0.1338(3) 0.066(3) Uani 1 1 d . A .
H5D H 0.4680 0.2534 0.1274 0.079 Uiso 1 1 calc R . .
C6D C 0.5267(4) 0.3171(4) 0.1283(3) 0.058(3) Uani 1 1 d . . .
H6D H 0.5018 0.3460 0.1180 0.069 Uiso 1 1 calc R A .
C1E C 0.5962(3) 0.3273(4) 0.0308(2) 0.039(2) Uani 1 1 d . A .
C2E C 0.6292(4) 0.2790(4) 0.0400(2) 0.052(2) Uani 1 1 d . . .
H2E H 0.6672 0.2837 0.0494 0.062 Uiso 1 1 calc R A .
C3E C 0.6068(5) 0.2238(4) 0.0356(3) 0.064(3) Uani 1 1 d . A .
H3E H 0.6300 0.1916 0.0421 0.077 Uiso 1 1 calc R . .
C4E C 0.5525(5) 0.2146(5) 0.0223(3) 0.067(3) Uani 1 1 d . . .
H4E H 0.5380 0.1766 0.0202 0.080 Uiso 1 1 calc R A .
C5E C 0.5186(4) 0.2616(5) 0.0118(3) 0.065(3) Uani 1 1 d . A .
H5E H 0.4812 0.2557 0.0014 0.078 Uiso 1 1 calc R . .
C6E C 0.5402(4) 0.3181(4) 0.0166(3) 0.057(3) Uani 1 1 d . . .
H6E H 0.5168 0.3502 0.0102 0.068 Uiso 1 1 calc R A .
C1F C 0.5946(3) 0.4398(4) -0.0072(2) 0.037(2) Uani 1 1 d . A .
C2F C 0.5831(3) 0.4992(4) -0.0048(2) 0.040(2) Uani 1 1 d . . .
H2F H 0.5871 0.5182 0.0211 0.048 Uiso 1 1 calc R A .
C3F C 0.5665(4) 0.5298(4) -0.0387(3) 0.049(2) Uani 1 1 d . A .
H3F H 0.5594 0.5699 -0.0366 0.058 Uiso 1 1 calc R . .
C4F C 0.5598(4) 0.5020(5) -0.0767(3) 0.058(3) Uani 1 1 d . . .
H4F H 0.5478 0.5234 -0.1004 0.070 Uiso 1 1 calc R A .
C5F C 0.5705(4) 0.4442(5) -0.0805(2) 0.053(3) Uani 1 1 d . A .
H5F H 0.5656 0.4256 -0.1064 0.063 Uiso 1 1 calc R . .
C6F C 0.5884(3) 0.4129(4) -0.0460(2) 0.043(2) Uani 1 1 d . . .
H6F H 0.5965 0.3730 -0.0486 0.052 Uiso 1 1 calc R A .
C1G C 0.7273(3) 0.3783(3) -0.0550(2) 0.0320(19) Uani 1 1 d . A .
C2G C 0.7155(4) 0.3228(4) -0.0413(2) 0.045(2) Uani 1 1 d . . .
H2G H 0.7246 0.3126 -0.0135 0.054 Uiso 1 1 calc R A .
C3G C 0.6904(4) 0.2814(4) -0.0679(3) 0.062(3) Uani 1 1 d . A .
H3G H 0.6829 0.2437 -0.0581 0.074 Uiso 1 1 calc R . .
C4G C 0.6767(4) 0.2963(5) -0.1087(3) 0.069(3) Uani 1 1 d . . .
H4G H 0.6591 0.2691 -0.1268 0.082 Uiso 1 1 calc R A .
C5G C 0.6888(4) 0.3506(5) -0.1225(3) 0.057(3) Uani 1 1 d . A .
H5G H 0.6799 0.3607 -0.1503 0.068 Uiso 1 1 calc R . .
C6G C 0.7139(3) 0.3910(4) -0.0964(2) 0.041(2) Uani 1 1 d . . .
H6G H 0.7221 0.4282 -0.1069 0.049 Uiso 1 1 calc R A .
C1H C 0.8341(3) 0.4309(3) -0.0300(2) 0.0280(17) Uani 1 1 d . A .
C2H C 0.8726(3) 0.4511(4) 0.0002(2) 0.043(2) Uani 1 1 d . . .
H2H H 0.8597 0.4617 0.0266 0.051 Uiso 1 1 calc R A .
C3H C 0.9295(4) 0.4558(4) -0.0085(3) 0.053(2) Uani 1 1 d . A .
H3H H 0.9551 0.4698 0.0122 0.063 Uiso 1 1 calc R . .
C4H C 0.9495(4) 0.4405(4) -0.0462(3) 0.052(2) Uani 1 1 d . . .
H4H H 0.9884 0.4441 -0.0519 0.062 Uiso 1 1 calc R A .
C5H C 0.9117(4) 0.4196(4) -0.0763(3) 0.059(3) Uani 1 1 d . A .
H5H H 0.9250 0.4093 -0.1027 0.071 Uiso 1 1 calc R . .
C6H C 0.8545(4) 0.4138(4) -0.0679(2) 0.047(2) Uani 1 1 d . . .
H6H H 0.8294 0.3980 -0.0882 0.056 Uiso 1 1 calc R A .
C1I C 0.8198(3) 0.5888(3) -0.0254(2) 0.0338(19) Uani 1 1 d . A .
C2I C 0.8574(4) 0.6117(4) 0.0033(3) 0.064(3) Uani 1 1 d . . .
H2I H 0.8470 0.6141 0.0314 0.077 Uiso 1 1 calc R A .
C3I C 0.9094(4) 0.6310(5) -0.0077(3) 0.084(4) Uani 1 1 d . A .
H3I H 0.9348 0.6454 0.0129 0.101 Uiso 1 1 calc R . .
C4I C 0.9252(5) 0.6297(5) -0.0482(4) 0.078(3) Uani 1 1 d . . .
H4I H 0.9604 0.6452 -0.0561 0.094 Uiso 1 1 calc R A .
C5I C 0.8900(5) 0.6062(5) -0.0764(3) 0.092(4) Uani 1 1 d . A .
H5I H 0.9012 0.6037 -0.1043 0.111 Uiso 1 1 calc R . .
C6I C 0.8370(4) 0.5853(5) -0.0656(3) 0.078(4) Uani 1 1 d . . .
H6I H 0.8128 0.5687 -0.0861 0.094 Uiso 1 1 calc R A .
C1J C 0.6998(3) 0.6170(3) -0.0317(2) 0.040(2) Uani 1 1 d . A .
C2J C 0.6828(6) 0.6157(5) -0.0730(3) 0.111(5) Uani 1 1 d . . .
H2J H 0.6987 0.5882 -0.0910 0.133 Uiso 1 1 calc R A .
C3J C 0.6429(7) 0.6540(6) -0.0881(4) 0.148(7) Uani 1 1 d . A .
H3J H 0.6303 0.6516 -0.1161 0.177 Uiso 1 1 calc R . .
C4J C 0.6218(5) 0.6950(5) -0.0632(4) 0.096(4) Uani 1 1 d . . .
H4J H 0.5964 0.7228 -0.0744 0.116 Uiso 1 1 calc R A .
C5J C 0.6362(4) 0.6968(4) -0.0225(3) 0.068(3) Uani 1 1 d . A .
H5J H 0.6199 0.7244 -0.0047 0.081 Uiso 1 1 calc R . .
C6J C 0.6763(3) 0.6566(4) -0.0071(3) 0.045(2) Uani 1 1 d . . .
H6J H 0.6869 0.6575 0.0213 0.054 Uiso 1 1 calc R A .
C1K C 0.7869(3) 0.5661(3) 0.2337(2) 0.037(2) Uani 1 1 d . A .
C2K C 0.8345(5) 0.5652(6) 0.2110(3) 0.097(4) Uani 1 1 d . . .
H2K H 0.8309 0.5574 0.1823 0.117 Uiso 1 1 calc R A .
C3K C 0.8874(5) 0.5752(8) 0.2276(4) 0.135(7) Uani 1 1 d . A .
H3K H 0.9195 0.5709 0.2109 0.162 Uiso 1 1 calc R . .
C4K C 0.8946(5) 0.5914(5) 0.2682(4) 0.095(4) Uani 1 1 d . . .
H4K H 0.9307 0.6012 0.2796 0.113 Uiso 1 1 calc R A .
C5K C 0.8466(5) 0.5927(4) 0.2919(3) 0.078(4) Uani 1 1 d . A .
H5K H 0.8502 0.6018 0.3204 0.093 Uiso 1 1 calc R . .
C6K C 0.7933(4) 0.5811(4) 0.2748(3) 0.054(2) Uani 1 1 d . . .
H6K H 0.7611 0.5835 0.2916 0.065 Uiso 1 1 calc R A .
C1L C 0.6728(3) 0.6044(3) 0.2313(2) 0.0331(19) Uani 1 1 d . A .
C2L C 0.6823(4) 0.6607(4) 0.2186(2) 0.049(2) Uani 1 1 d . . .
H2L H 0.7111 0.6682 0.1994 0.058 Uiso 1 1 calc R A .
C3L C 0.6504(5) 0.7065(4) 0.2333(3) 0.068(3) Uani 1 1 d . A .
H3L H 0.6580 0.7445 0.2241 0.082 Uiso 1 1 calc R . .
C4L C 0.6080(5) 0.6972(5) 0.2609(3) 0.076(3) Uani 1 1 d . . .
H4L H 0.5872 0.7286 0.2716 0.092 Uiso 1 1 calc R A .
C5L C 0.5962(5) 0.6409(5) 0.2729(3) 0.077(3) Uani 1 1 d . A .
H5L H 0.5659 0.6335 0.2908 0.092 Uiso 1 1 calc R . .
C6L C 0.6296(4) 0.5943(4) 0.2583(3) 0.053(3) Uani 1 1 d . . .
H6L H 0.6221 0.5562 0.2672 0.064 Uiso 1 1 calc R A .
C1M C 0.1763(3) 0.7651(3) 0.1373(2) 0.0317(19) Uani 1 1 d . . .
C2M C 0.1483(4) 0.7128(4) 0.1428(3) 0.060(3) Uani 1 1 d . . .
H2M H 0.1183 0.7020 0.1245 0.072 Uiso 1 1 calc R . .
C3M C 0.1648(5) 0.6767(4) 0.1754(3) 0.071(3) Uani 1 1 d . . .
H3M H 0.1459 0.6409 0.1785 0.085 Uiso 1 1 calc R . .
C4M C 0.2064(4) 0.6907(4) 0.2026(3) 0.059(3) Uani 1 1 d . . .
H4M H 0.2161 0.6657 0.2248 0.071 Uiso 1 1 calc R . .
C5M C 0.2346(5) 0.7420(5) 0.1976(3) 0.083(4) Uani 1 1 d . . .
H5M H 0.2644 0.7524 0.2163 0.100 Uiso 1 1 calc R . .
C6M C 0.2191(4) 0.7791(4) 0.1647(3) 0.066(3) Uani 1 1 d . . .
H6M H 0.2387 0.8144 0.1616 0.079 Uiso 1 1 calc R . .
C1N C 0.1293(3) 0.7686(3) 0.0538(2) 0.0326(19) Uani 1 1 d . . .
C2N C 0.1682(3) 0.7592(3) 0.0229(2) 0.039(2) Uani 1 1 d . . .
H2N H 0.2047 0.7760 0.0247 0.046 Uiso 1 1 calc R . .
C3N C 0.1525(4) 0.7251(4) -0.0106(3) 0.056(3) Uani 1 1 d . . .
H3N H 0.1790 0.7186 -0.0317 0.068 Uiso 1 1 calc R . .
C4N C 0.0994(4) 0.6999(4) -0.0145(3) 0.056(3) Uani 1 1 d . . .
H4N H 0.0898 0.6761 -0.0374 0.068 Uiso 1 1 calc R . .
C5N C 0.0606(4) 0.7107(4) 0.0163(3) 0.049(2) Uani 1 1 d . . .
H5N H 0.0236 0.6953 0.0141 0.059 Uiso 1 1 calc R . .
C6N C 0.0764(4) 0.7440(3) 0.0502(2) 0.043(2) Uani 1 1 d . . .
H6N H 0.0501 0.7500 0.0714 0.051 Uiso 1 1 calc R . .
C1O C 0.0773(3) 0.9149(3) 0.0142(2) 0.0333(19) Uani 1 1 d . . .
C2O C 0.0513(4) 0.8669(4) -0.0038(2) 0.045(2) Uani 1 1 d . . .
H2O H 0.0727 0.8411 -0.0199 0.055 Uiso 1 1 calc R . .
C3O C -0.0058(4) 0.8567(4) 0.0018(3) 0.054(2) Uani 1 1 d . . .
H3O H -0.0228 0.8236 -0.0103 0.065 Uiso 1 1 calc R . .
C4O C -0.0381(4) 0.8939(4) 0.0245(3) 0.057(3) Uani 1 1 d . . .
H4O H -0.0771 0.8868 0.0279 0.069 Uiso 1 1 calc R . .
C5O C -0.0122(4) 0.9420(4) 0.0425(3) 0.051(2) Uani 1 1 d . . .
H5O H -0.0341 0.9678 0.0583 0.061 Uiso 1 1 calc R . .
C6O C 0.0442(3) 0.9529(4) 0.0379(2) 0.036(2) Uani 1 1 d . . .
H6O H 0.0610 0.9858 0.0506 0.044 Uiso 1 1 calc R . .
C1P C 0.1717(4) 0.8976(3) -0.0400(2) 0.0346(19) Uani 1 1 d . . .
C2P C 0.1395(4) 0.9095(4) -0.0750(3) 0.061(3) Uani 1 1 d . . .
H2P H 0.1068 0.9327 -0.0727 0.073 Uiso 1 1 calc R . .
C3P C 0.1535(5) 0.8886(4) -0.1134(3) 0.072(3) Uani 1 1 d . . .
H3P H 0.1309 0.8979 -0.1371 0.086 Uiso 1 1 calc R . .
C4P C 0.2004(5) 0.8543(4) -0.1171(3) 0.056(3) Uani 1 1 d . . .
H4P H 0.2090 0.8384 -0.1433 0.068 Uiso 1 1 calc R . .
C5P C 0.2347(4) 0.8428(4) -0.0839(3) 0.059(3) Uani 1 1 d . . .
H5P H 0.2683 0.8211 -0.0870 0.071 Uiso 1 1 calc R . .
C6P C 0.2196(4) 0.8635(4) -0.0449(2) 0.048(2) Uani 1 1 d . . .
H6P H 0.2425 0.8540 -0.0214 0.057 Uiso 1 1 calc R . .
C1R C 0.2576(3) 1.0173(3) -0.0455(2) 0.0331(19) Uani 1 1 d . . .
C2R C 0.2300(4) 1.0393(4) -0.0806(2) 0.054(3) Uani 1 1 d . . .
H2R H 0.1959 1.0601 -0.0779 0.065 Uiso 1 1 calc R . .
C3R C 0.2519(5) 1.0310(5) -0.1194(3) 0.079(4) Uani 1 1 d . . .
H3R H 0.2335 1.0474 -0.1430 0.095 Uiso 1 1 calc R . .
C4R C 0.3004(5) 0.9991(6) -0.1239(3) 0.081(4) Uani 1 1 d . . .
H4R H 0.3147 0.9925 -0.1506 0.097 Uiso 1 1 calc R . .
C5R C 0.3277(5) 0.9769(5) -0.0901(3) 0.091(4) Uani 1 1 d . . .
H5R H 0.3613 0.9553 -0.0933 0.110 Uiso 1 1 calc R . .
C6R C 0.3065(4) 0.9858(4) -0.0506(3) 0.065(3) Uani 1 1 d . . .
H6R H 0.3258 0.9701 -0.0272 0.078 Uiso 1 1 calc R . .
C1T C 0.2227(3) 1.1118(3) 0.0042(2) 0.0302(18) Uani 1 1 d . . .
C2T C 0.2569(4) 1.1465(4) -0.0197(3) 0.054(3) Uani 1 1 d . . .
H2T H 0.2847 1.1289 -0.0362 0.065 Uiso 1 1 calc R . .
C3T C 0.2517(4) 1.2052(4) -0.0201(3) 0.063(3) Uani 1 1 d . . .
H3T H 0.2757 1.2277 -0.0368 0.076 Uiso 1 1 calc R . .
C4T C 0.2121(5) 1.2318(4) 0.0033(4) 0.089(4) Uani 1 1 d . . .
H4T H 0.2082 1.2725 0.0027 0.107 Uiso 1 1 calc R . .
C5T C 0.1784(5) 1.1990(4) 0.0274(5) 0.112(5) Uani 1 1 d . . .
H5T H 0.1513 1.2173 0.0440 0.135 Uiso 1 1 calc R . .
C6T C 0.1831(5) 1.1394(4) 0.0280(3) 0.082(4) Uani 1 1 d . . .
H6T H 0.1590 1.1174 0.0448 0.099 Uiso 1 1 calc R . .
C1U C 0.4232(3) 1.0438(3) 0.1064(2) 0.0297(18) Uani 1 1 d . . .
C2U C 0.4218(5) 0.9987(4) 0.1331(3) 0.075(3) Uani 1 1 d . . .
H2U H 0.3881 0.9771 0.1357 0.090 Uiso 1 1 calc R . .
C3U C 0.4712(6) 0.9838(5) 0.1574(4) 0.106(5) Uani 1 1 d . . .
H3U H 0.4703 0.9526 0.1763 0.127 Uiso 1 1 calc R . .
C4U C 0.5201(5) 1.0154(4) 0.1529(3) 0.067(3) Uani 1 1 d . . .
H4U H 0.5536 1.0049 0.1677 0.081 Uiso 1 1 calc R . .
C5U C 0.5198(4) 1.0608(4) 0.1275(3) 0.054(3) Uani 1 1 d . . .
H5U H 0.5531 1.0834 0.1257 0.065 Uiso 1 1 calc R . .
C6U C 0.4728(4) 1.0761(4) 0.1040(3) 0.046(2) Uani 1 1 d . . .
H6U H 0.4742 1.1085 0.0862 0.055 Uiso 1 1 calc R . .
C1V C 0.3945(3) 1.0801(4) 0.0254(2) 0.0327(19) Uani 1 1 d . . .
C2V C 0.4211(4) 1.0356(4) 0.0034(3) 0.052(2) Uani 1 1 d . . .
H2V H 0.4201 0.9974 0.0138 0.063 Uiso 1 1 calc R . .
C3V C 0.4490(4) 1.0467(5) -0.0336(3) 0.066(3) Uani 1 1 d . . .
H3V H 0.4685 1.0168 -0.0473 0.080 Uiso 1 1 calc R . .
C4V C 0.4476(4) 1.1011(5) -0.0494(3) 0.062(3) Uani 1 1 d . . .
H4V H 0.4656 1.1091 -0.0746 0.074 Uiso 1 1 calc R . .
C5V C 0.4204(4) 1.1442(4) -0.0292(3) 0.058(3) Uani 1 1 d . . .
H5V H 0.4199 1.1819 -0.0407 0.070 Uiso 1 1 calc R . .
C6V C 0.3933(4) 1.1340(4) 0.0079(2) 0.053(3) Uani 1 1 d . . .
H6V H 0.3740 1.1644 0.0211 0.063 Uiso 1 1 calc R . .
C1W C 0.2633(3) 1.1927(2) 0.1509(3) 0.035(10) Uiso 0.60 1 d PG B 1
C2W C 0.2268(3) 1.1976(3) 0.1842(2) 0.047(4) Uiso 0.60 1 d PG B 1
H2W H 0.2203 1.1653 0.2015 0.057 Uiso 0.60 1 calc PR B 1
C3W C 0.2000(3) 1.2502(3) 0.1921(2) 0.049(4) Uiso 0.60 1 d PG B 1
H3W H 0.1753 1.2536 0.2146 0.059 Uiso 0.60 1 calc PR B 1
C4W C 0.2096(3) 1.2980(2) 0.1666(3) 0.063(7) Uiso 0.60 1 d PG B 1
H4W H 0.1915 1.3336 0.1719 0.075 Uiso 0.60 1 calc PR B 1
C5W C 0.2461(4) 1.2931(3) 0.1333(3) 0.079(5) Uiso 0.60 1 d PG B 1
H5W H 0.2526 1.3254 0.1160 0.094 Uiso 0.60 1 calc PR B 1
C6W C 0.2729(3) 1.2404(3) 0.1254(2) 0.060(4) Uiso 0.60 1 d PG B 1
H6W H 0.2976 1.2371 0.1029 0.072 Uiso 0.60 1 calc PR B 1
C111 C 0.2617(3) 1.1951(2) 0.1469(3) 0.037(16) Uiso 0.40 1 d PG B 2
C112 C 0.2740(3) 1.2298(3) 0.1814(2) 0.060(7) Uiso 0.40 1 d PG B 2
H112 H 0.3019 1.2180 0.2012 0.072 Uiso 0.40 1 calc PR B 2
C113 C 0.2452(3) 1.2820(3) 0.1867(2) 0.074(8) Uiso 0.40 1 d PG B 2
H113 H 0.2535 1.3055 0.2100 0.088 Uiso 0.40 1 calc PR B 2
C114 C 0.2040(3) 1.2994(3) 0.1574(3) 0.073(12) Uiso 0.40 1 d PG B 2
H114 H 0.1844 1.3347 0.1609 0.087 Uiso 0.40 1 calc PR B 2
C115 C 0.1916(3) 1.2646(4) 0.1229(3) 0.089(9) Uiso 0.40 1 d PG B 2
H115 H 0.1638 1.2764 0.1031 0.106 Uiso 0.40 1 calc PR B 2
C116 C 0.2205(4) 1.2125(4) 0.1176(2) 0.083(8) Uiso 0.40 1 d PG B 2
H116 H 0.2122 1.1890 0.0942 0.099 Uiso 0.40 1 calc PR B 2
C1X C 0.3440(3) 1.1111(3) 0.1817(2) 0.035(2) Uani 1 1 d . B .
C2X C 0.3928(4) 1.1446(4) 0.1858(3) 0.066(3) Uani 1 1 d . . .
H2X H 0.3988 1.1751 0.1669 0.079 Uiso 1 1 calc R B .
C3X C 0.4335(4) 1.1340(5) 0.2175(4) 0.076(3) Uani 1 1 d . B .
H3X H 0.4657 1.1581 0.2199 0.091 Uiso 1 1 calc R . .
C4X C 0.4275(5) 1.0913(5) 0.2438(3) 0.077(3) Uani 1 1 d . . .
H4X H 0.4559 1.0833 0.2642 0.092 Uiso 1 1 calc R B .
C5X C 0.3801(6) 1.0590(6) 0.2409(4) 0.143(7) Uani 1 1 d . B .
H5X H 0.3751 1.0288 0.2603 0.172 Uiso 1 1 calc R . .
C6X C 0.3372(5) 1.0686(5) 0.2099(3) 0.091(4) Uani 1 1 d . . .
H6X H 0.3042 1.0454 0.2090 0.109 Uiso 1 1 calc R B .
C1Y C 0.0918(4) 0.8581(4) 0.2052(2) 0.038(2) Uani 1 1 d . . .
C2Y C 0.0521(5) 0.8192(5) 0.2158(3) 0.100(4) Uani 1 1 d . . .
H2Y H 0.0220 0.8103 0.1970 0.120 Uiso 1 1 calc R . .
C3Y C 0.0551(6) 0.7921(6) 0.2541(4) 0.114(5) Uani 1 1 d . . .
H3Y H 0.0269 0.7652 0.2614 0.137 Uiso 1 1 calc R . .
C4Y C 0.0976(7) 0.8038(5) 0.2806(3) 0.096(4) Uani 1 1 d . . .
H4Y H 0.1000 0.7846 0.3065 0.115 Uiso 1 1 calc R . .
C5Y C 0.1365(8) 0.8426(7) 0.2707(4) 0.158(8) Uani 1 1 d . . .
H5Y H 0.1664 0.8515 0.2896 0.190 Uiso 1 1 calc R . .
C6Y C 0.1330(5) 0.8697(6) 0.2329(3) 0.110(5) Uani 1 1 d . . .
H6Y H 0.1607 0.8975 0.2263 0.131 Uiso 1 1 calc R . .
C1Z C 0.0146(3) 0.9264(3) 0.1543(2) 0.035(2) Uani 1 1 d . . .
C2Z C -0.0318(4) 0.8915(4) 0.1440(2) 0.045(2) Uani 1 1 d . . .
H2Z H -0.0265 0.8519 0.1381 0.054 Uiso 1 1 calc R . .
C3Z C -0.0857(4) 0.9150(4) 0.1424(3) 0.057(3) Uani 1 1 d . . .
H3Z H -0.1172 0.8912 0.1356 0.068 Uiso 1 1 calc R . .
C4Z C -0.0939(4) 0.9741(5) 0.1507(3) 0.060(3) Uani 1 1 d . . .
H4Z H -0.1306 0.9904 0.1496 0.072 Uiso 1 1 calc R . .
C5Z C -0.0482(4) 1.0068(4) 0.1603(3) 0.064(3) Uani 1 1 d . . .
H5Z H -0.0532 1.0466 0.1659 0.077 Uiso 1 1 calc R . .
C6Z C 0.0057(4) 0.9839(4) 0.1621(3) 0.050(2) Uani 1 1 d . . .
H6Z H 0.0368 1.0082 0.1687 0.060 Uiso 1 1 calc R . .
C1S C 1.0336(14) 0.4530(9) 0.2122(8) 0.42(2) Uiso 1 1 d D . .
H1S1 H 0.9919 0.4563 0.2118 0.505 Uiso 1 1 calc R . .
H1S2 H 1.0489 0.4648 0.2396 0.505 Uiso 1 1 calc R . .
Cl1A Cl 1.0658(5) 0.4959(5) 0.1690(2) 0.382(7) Uani 1 1 d D . .
Cl1B Cl 1.0576(3) 0.3770(5) 0.1976(2) 0.294(4) Uani 1 1 d D . .
C2S C 0.9214(9) 0.6830(9) 0.1166(6) 0.261(12) Uiso 1 1 d D . .
H2S1 H 0.9260 0.6496 0.0980 0.314 Uiso 1 1 calc R . .
H2S2 H 0.8858 0.6774 0.1315 0.314 Uiso 1 1 calc R . .
Cl2A Cl 0.9804(3) 0.6837(4) 0.1545(3) 0.285(4) Uani 1 1 d D . .
Cl2B Cl 0.9154(3) 0.7460(3) 0.0866(2) 0.253(3) Uani 1 1 d D . .
C3S C 0.2143(6) 0.9793(9) 0.3043(6) 0.196(8) Uiso 1 1 d D . .
H3S1 H 0.2144 1.0098 0.2829 0.236 Uiso 1 1 calc R . .
H3S2 H 0.2109 0.9419 0.2897 0.236 Uiso 1 1 calc R . .
Cl3A Cl 0.1552(3) 0.9883(3) 0.3327(2) 0.245(3) Uani 1 1 d D . .
Cl3B Cl 0.2830(4) 0.9806(3) 0.33133(17) 0.275(4) Uani 1 1 d D . .

loop_
 _atom_site_aniso_label
 _atom_site_aniso_U_11
 _atom_site_aniso_U_22
 _atom_site_aniso_U_33
 _atom_site_aniso_U_23
 _atom_site_aniso_U_13
 _atom_site_aniso_U_12
Cu1 0.0276(5) 0.0344(6) 0.0271(5) -0.0018(4) 0.0027(4) 0.0025(4)
Cu2 0.0287(6) 0.0338(6) 0.0265(5) -0.0020(4) 0.0008(4) 0.0029(4)
Cu3 0.0368(6) 0.0373(6) 0.0277(5) -0.0031(5) 0.0015(4) 0.0030(5)
Cu4 0.0391(6) 0.0344(6) 0.0266(5) -0.0004(4) 0.0006(4) 0.0054(5)
Cu5 0.0278(5) 0.0282(5) 0.0300(5) -0.0009(4) 0.0025(4) -0.0002(4)
Cu6 0.0295(6) 0.0272(5) 0.0309(5) -0.0006(4) 0.0031(4) -0.0004(4)
Cu7 0.0324(6) 0.0322(6) 0.0416(6) -0.0045(5) 0.0057(4) -0.0001(4)
Cu8 0.0358(6) 0.0377(6) 0.0395(6) -0.0037(5) 0.0062(4) -0.0043(5)
P1 0.0345(12) 0.0307(12) 0.0249(10) -0.0004(9) 0.0005(9) 0.0022(9)
P2 0.0254(12) 0.0369(12) 0.0286(10) -0.0005(10) 0.0046(8) 0.0004(9)
P3 0.0257(12) 0.0405(13) 0.0288(11) -0.0056(10) 0.0015(8) -0.0009(9)
P4 0.0280(12) 0.0284(12) 0.0259(10) -0.0052(9) 0.0025(8) 0.0015(9)
P5 0.0337(12) 0.0289(12) 0.0275(10) -0.0007(9) -0.0006(9) 0.0043(9)
P6 0.0354(13) 0.0311(12) 0.0267(10) -0.0013(10) 0.0000(9) 0.0028(9)
P7 0.0302(12) 0.0277(12) 0.0289(11) -0.0012(9) 0.0048(9) 0.0005(9)
P8 0.0292(12) 0.0285(12) 0.0293(11) 0.0008(9) 0.0020(9) -0.0014(9)
P9 0.0318(12) 0.0286(12) 0.0275(10) 0.0012(9) 0.0021(9) -0.0001(9)
P10 0.0268(12) 0.0282(12) 0.0326(11) -0.0019(10) 0.0017(9) -0.0001(9)
P11 0.0331(13) 0.0290(12) 0.0387(12) -0.0061(10) 0.0048(9) -0.0017(9)
P12 0.0277(12) 0.0347(12) 0.0334(11) -0.0008(10) 0.0104(9) 0.0026(9)
S1 0.0362(12) 0.0295(11) 0.0336(11) -0.0020(9) 0.0020(9) 0.0071(9)
S2 0.0264(11) 0.0301(11) 0.0270(10) -0.0012(9) -0.0005(8) 0.0047(8)
S3 0.0352(13) 0.0348(12) 0.0379(11) -0.0044(10) -0.0023(9) -0.0023(9)
S4 0.0314(12) 0.0338(12) 0.0327(10) -0.0020(9) 0.0010(9) 0.0018(9)
S5 0.0295(11) 0.0293(11) 0.0340(11) -0.0045(9) 0.0070(8) 0.0037(9)
S6 0.0260(11) 0.0261(11) 0.0297(10) -0.0009(9) 0.0037(8) 0.0046(8)
S7 0.0412(13) 0.0430(13) 0.0322(11) -0.0051(10) 0.0044(9) 0.0068(10)
S8 0.0359(13) 0.0407(13) 0.0357(11) -0.0053(10) 0.0007(9) 0.0076(10)
C1 0.042(5) 0.041(5) 0.028(4) -0.001(4) -0.002(4) 0.014(4)
C2 0.057(7) 0.051(6) 0.053(6) 0.016(5) 0.007(5) 0.015(5)
C3 0.051(7) 0.075(8) 0.072(7) 0.013(6) -0.010(5) 0.037(6)
C4 0.031(6) 0.077(8) 0.070(7) -0.004(6) 0.009(5) 0.025(6)
C5 0.022(5) 0.075(7) 0.040(5) -0.004(5) -0.002(4) 0.015(5)
C6 0.019(5) 0.093(8) 0.046(5) 0.003(6) 0.003(4) 0.012(5)
C7 0.029(5) 0.064(7) 0.050(5) -0.005(5) 0.008(4) -0.013(5)
C8 0.035(5) 0.045(5) 0.035(4) -0.006(4) 0.010(4) 0.004(4)
C9 0.021(4) 0.042(5) 0.024(4) 0.002(4) 0.003(3) 0.007(4)
C10 0.029(5) 0.054(6) 0.026(4) -0.006(4) 0.000(3) 0.015(4)
C11 0.051(6) 0.033(5) 0.026(4) 0.003(4) -0.005(4) 0.001(4)
C12 0.062(7) 0.037(6) 0.078(7) -0.006(5) -0.009(5) -0.014(5)
C13 0.097(10) 0.032(6) 0.100(8) -0.021(6) -0.017(7) -0.002(6)
C14 0.080(9) 0.039(6) 0.105(9) -0.018(6) -0.009(7) 0.017(6)
C15 0.071(8) 0.038(6) 0.049(6) -0.002(5) 0.003(5) 0.014(5)
C16 0.071(8) 0.044(6) 0.086(8) -0.003(6) -0.003(6) 0.029(6)
C17 0.047(7) 0.065(8) 0.158(12) -0.007(8) 0.008(7) 0.022(6)
C18 0.052(7) 0.054(7) 0.097(8) -0.004(6) 0.006(6) 0.014(5)
C19 0.039(5) 0.041(5) 0.038(5) 0.003(4) 0.010(4) 0.012(4)
C20 0.039(5) 0.031(5) 0.033(4) 0.001(4) 0.003(4) 0.008(4)
C21 0.037(5) 0.040(5) 0.021(4) -0.007(4) 0.006(3) 0.001(4)
C22 0.018(4) 0.041(5) 0.035(4) -0.004(4) -0.004(3) 0.000(3)
C23 0.029(5) 0.036(5) 0.026(4) 0.001(4) 0.001(3) -0.003(4)
C24 0.020(4) 0.021(4) 0.055(5) -0.008(4) 0.000(4) 0.000(3)
C25 0.048(6) 0.036(5) 0.058(6) -0.013(5) 0.001(5) 0.008(4)
C26 0.039(6) 0.043(6) 0.094(8) -0.002(6) -0.001(5) 0.018(5)
C27 0.052(7) 0.033(5) 0.080(7) -0.002(5) -0.026(5) 0.012(5)
C28 0.038(5) 0.030(5) 0.061(6) -0.001(5) -0.008(4) 0.001(4)
C29 0.068(7) 0.042(6) 0.045(6) 0.005(5) -0.023(5) 0.005(5)
C30 0.077(7) 0.049(6) 0.030(5) 0.000(4) -0.011(5) 0.003(5)
C31 0.043(5) 0.039(5) 0.042(5) -0.003(4) -0.005(4) 0.006(4)
C32 0.034(5) 0.021(4) 0.033(4) -0.002(4) -0.006(3) -0.003(3)
C33 0.026(5) 0.024(4) 0.052(5) 0.002(4) -0.002(4) 0.001(3)
C34 0.034(5) 0.063(6) 0.050(5) -0.025(5) -0.008(4) 0.011(5)
C35 0.088(9) 0.127(11) 0.059(6) -0.056(7) -0.029(6) 0.065(8)
C36 0.121(12) 0.144(13) 0.086(9) -0.077(9) -0.046(8) 0.078(10)
C37 0.096(10) 0.129(12) 0.097(9) -0.065(9) -0.039(8) 0.071(9)
C38 0.047(6) 0.090(8) 0.064(6) -0.029(6) -0.010(5) 0.040(6)
C39 0.096(10) 0.126(11) 0.073(8) -0.032(8) -0.018(7) 0.076(8)
C40 0.147(13) 0.139(12) 0.066(8) 0.002(8) -0.003(7) 0.126(10)
C41 0.093(9) 0.107(9) 0.040(5) -0.016(6) -0.010(5) 0.068(7)
C42 0.035(5) 0.065(6) 0.040(5) -0.006(5) -0.003(4) 0.009(5)
C43 0.041(6) 0.051(6) 0.052(5) -0.021(5) 0.003(4) 0.011(4)
C44 0.026(5) 0.040(5) 0.030(4) 0.000(4) 0.005(3) -0.003(4)
C45 0.026(4) 0.034(5) 0.022(4) 0.001(3) 0.004(3) 0.003(3)
C46 0.033(5) 0.034(5) 0.029(4) -0.002(4) 0.000(3) 0.002(4)
C1B 0.040(5) 0.029(5) 0.028(4) 0.004(4) -0.003(4) 0.000(4)
C2B 0.053(6) 0.032(5) 0.073(6) -0.001(5) 0.007(5) 0.009(5)
C3B 0.086(9) 0.028(6) 0.087(8) 0.009(6) -0.021(6) 0.004(5)
C4B 0.086(9) 0.062(8) 0.058(7) -0.003(6) 0.019(6) -0.021(6)
C5B 0.108(10) 0.064(8) 0.063(7) -0.004(6) 0.045(6) -0.017(7)
C6B 0.074(7) 0.043(6) 0.061(6) -0.008(5) 0.027(5) 0.005(5)
C1C 0.028(5) 0.044(5) 0.031(4) 0.000(4) 0.002(3) -0.002(4)
C2C 0.108(9) 0.043(6) 0.065(6) -0.005(5) 0.051(6) -0.002(6)
C3C 0.117(11) 0.066(8) 0.093(9) -0.006(7) 0.072(8) -0.012(7)
C4C 0.067(8) 0.079(9) 0.069(7) -0.025(7) 0.037(6) 0.006(6)
C5C 0.074(7) 0.056(6) 0.049(6) -0.012(5) 0.009(5) 0.022(5)
C6C 0.051(6) 0.047(6) 0.043(5) -0.003(5) 0.024(4) 0.008(4)
C1D 0.037(5) 0.039(5) 0.029(4) -0.003(4) 0.002(4) -0.004(4)
C2D 0.059(7) 0.036(6) 0.071(6) 0.010(5) -0.007(5) -0.003(5)
C3D 0.078(9) 0.045(7) 0.120(10) 0.020(7) -0.010(7) 0.003(6)
C4D 0.100(10) 0.055(7) 0.069(7) -0.012(6) -0.009(7) -0.038(7)
C5D 0.053(7) 0.072(8) 0.072(7) 0.022(6) -0.011(5) -0.030(6)
C6D 0.038(6) 0.055(6) 0.079(7) 0.020(5) -0.011(5) -0.010(5)
C1E 0.026(5) 0.056(6) 0.034(4) -0.014(4) 0.012(4) -0.010(4)
C2E 0.053(6) 0.054(6) 0.047(5) -0.004(5) -0.011(4) -0.003(5)
C3E 0.071(8) 0.040(6) 0.081(7) -0.007(6) 0.003(6) -0.008(5)
C4E 0.076(9) 0.054(7) 0.071(7) -0.022(6) 0.023(6) -0.031(6)
C5E 0.040(6) 0.085(9) 0.070(7) -0.039(7) 0.009(5) -0.015(6)
C6E 0.037(6) 0.068(7) 0.066(6) -0.031(6) 0.010(5) -0.003(5)
C1F 0.021(4) 0.057(6) 0.032(4) -0.005(4) 0.000(3) 0.005(4)
C2F 0.028(5) 0.055(6) 0.036(5) -0.008(4) -0.012(4) 0.010(4)
C3F 0.049(6) 0.050(6) 0.047(5) 0.003(5) 0.001(4) 0.021(5)
C4F 0.038(6) 0.093(9) 0.044(6) 0.019(6) 0.003(4) 0.024(5)
C5F 0.046(6) 0.080(8) 0.031(5) -0.008(5) -0.011(4) 0.019(5)
C6F 0.038(5) 0.055(6) 0.037(5) -0.004(5) 0.000(4) 0.006(4)
C1G 0.029(5) 0.031(5) 0.036(5) 0.001(4) 0.005(3) 0.003(4)
C2G 0.053(6) 0.044(6) 0.037(5) -0.008(4) 0.003(4) 0.000(4)
C3G 0.083(8) 0.036(6) 0.066(7) -0.014(5) -0.014(6) -0.006(5)
C4G 0.096(9) 0.062(8) 0.047(6) -0.034(6) -0.014(5) -0.019(6)
C5G 0.059(7) 0.074(8) 0.037(5) -0.008(5) -0.007(4) -0.008(6)
C6G 0.048(6) 0.036(5) 0.038(5) -0.002(4) 0.007(4) -0.003(4)
C1H 0.026(4) 0.026(4) 0.032(4) 0.000(4) 0.005(3) 0.000(3)
C2H 0.035(5) 0.057(6) 0.037(5) -0.008(4) 0.011(4) -0.009(4)
C3H 0.038(6) 0.069(7) 0.051(6) -0.012(5) -0.001(4) -0.019(5)
C4H 0.051(6) 0.055(6) 0.051(6) 0.001(5) 0.025(5) -0.003(5)
C5H 0.049(7) 0.078(7) 0.050(6) -0.013(5) 0.016(5) 0.002(5)
C6H 0.045(6) 0.067(6) 0.028(4) -0.014(4) 0.003(4) 0.002(5)
C1I 0.038(5) 0.032(5) 0.031(4) 0.007(4) 0.005(4) 0.002(4)
C2I 0.054(7) 0.099(9) 0.039(5) -0.002(6) 0.012(5) -0.016(6)
C3I 0.049(7) 0.132(11) 0.072(7) -0.012(7) 0.014(6) -0.031(7)
C4I 0.061(8) 0.084(8) 0.091(8) -0.011(7) 0.035(7) -0.023(6)
C5I 0.101(10) 0.122(11) 0.054(7) 0.004(7) 0.012(6) -0.070(8)
C6I 0.079(8) 0.117(10) 0.040(6) 0.001(6) 0.011(5) -0.057(7)
C1J 0.047(6) 0.035(5) 0.037(5) 0.003(4) -0.003(4) 0.012(4)
C2J 0.191(14) 0.093(9) 0.046(6) -0.013(6) -0.045(7) 0.095(10)
C3J 0.242(19) 0.127(13) 0.071(8) -0.035(9) -0.060(10) 0.118(13)
C4J 0.128(11) 0.073(9) 0.085(9) -0.003(7) -0.054(8) 0.053(8)
C5J 0.072(8) 0.049(7) 0.083(8) 0.005(6) -0.002(6) 0.018(6)
C6J 0.043(6) 0.036(5) 0.056(5) 0.009(5) 0.009(4) 0.004(4)
C1K 0.040(5) 0.032(5) 0.039(5) 0.007(4) -0.012(4) -0.004(4)
C2K 0.055(8) 0.189(14) 0.048(6) 0.037(8) 0.003(6) -0.004(8)
C3K 0.051(9) 0.28(2) 0.073(9) 0.054(11) -0.012(7) -0.034(10)
C4K 0.057(8) 0.090(9) 0.135(12) 0.058(9) -0.031(8) -0.043(7)
C5K 0.104(10) 0.042(6) 0.084(8) 0.006(6) -0.061(7) -0.021(6)
C6K 0.065(7) 0.043(6) 0.054(6) -0.002(5) -0.009(5) -0.002(5)
C1L 0.044(5) 0.032(5) 0.024(4) -0.002(4) -0.003(4) -0.002(4)
C2L 0.065(7) 0.039(6) 0.043(5) -0.005(5) 0.016(4) -0.003(5)
C3L 0.099(9) 0.038(6) 0.068(7) -0.003(5) 0.031(6) 0.020(6)
C4L 0.104(9) 0.052(7) 0.073(7) -0.012(6) 0.024(7) 0.043(7)
C5L 0.083(9) 0.068(8) 0.081(8) 0.004(7) 0.041(6) 0.028(6)
C6L 0.072(7) 0.037(5) 0.050(5) 0.006(5) 0.020(5) 0.014(5)
C1M 0.041(5) 0.025(5) 0.029(4) 0.002(4) 0.011(4) 0.001(4)
C2M 0.066(7) 0.051(6) 0.063(6) 0.018(5) -0.013(5) -0.015(5)
C3M 0.097(9) 0.052(7) 0.063(7) 0.022(6) -0.010(6) -0.021(6)
C4M 0.081(8) 0.058(7) 0.039(5) 0.014(5) 0.003(5) -0.005(6)
C5M 0.114(10) 0.075(8) 0.057(7) 0.028(6) -0.048(6) -0.023(7)
C6M 0.077(8) 0.063(7) 0.057(6) 0.009(6) -0.019(5) -0.023(6)
C1N 0.047(5) 0.024(4) 0.027(4) -0.004(4) 0.004(4) 0.000(4)
C2N 0.039(5) 0.039(5) 0.037(5) -0.015(4) -0.009(4) 0.006(4)
C3N 0.064(7) 0.052(6) 0.053(6) -0.017(5) 0.003(5) 0.001(5)
C4N 0.087(8) 0.044(6) 0.038(5) -0.019(5) -0.012(5) -0.012(5)
C5N 0.056(6) 0.047(6) 0.044(5) -0.004(5) 0.000(5) -0.027(5)
C6N 0.044(6) 0.041(5) 0.044(5) -0.002(4) 0.008(4) -0.014(4)
C1O 0.034(5) 0.035(5) 0.031(4) 0.007(4) 0.001(4) -0.003(4)
C2O 0.042(6) 0.050(6) 0.044(5) -0.003(5) -0.001(4) 0.004(5)
C3O 0.035(6) 0.058(7) 0.069(6) 0.003(5) -0.013(5) -0.010(5)
C4O 0.023(5) 0.057(6) 0.092(7) 0.021(6) 0.003(5) -0.014(5)
C5O 0.044(6) 0.057(6) 0.052(5) 0.034(5) 0.009(4) 0.009(5)
C6O 0.033(5) 0.041(5) 0.034(4) 0.010(4) -0.003(4) 0.000(4)
C1P 0.051(6) 0.028(5) 0.026(4) 0.002(4) 0.008(4) -0.002(4)
C2P 0.092(8) 0.055(6) 0.035(5) -0.004(5) 0.001(5) 0.030(6)
C3P 0.128(11) 0.050(7) 0.037(6) 0.001(5) -0.012(6) 0.026(7)
C4P 0.100(9) 0.037(6) 0.033(5) -0.012(5) 0.013(5) -0.010(6)
C5P 0.059(7) 0.063(7) 0.057(6) -0.025(6) 0.017(5) 0.002(5)
C6P 0.050(6) 0.055(6) 0.038(5) -0.006(5) -0.002(4) -0.002(5)
C1R 0.028(5) 0.041(5) 0.031(4) -0.008(4) 0.004(4) -0.005(4)
C2R 0.042(6) 0.086(8) 0.034(5) -0.001(5) 0.007(4) -0.005(5)
C3R 0.059(8) 0.142(11) 0.037(6) 0.000(6) 0.006(5) -0.021(7)
C4R 0.069(9) 0.140(12) 0.036(6) -0.019(7) 0.026(6) -0.013(8)
C5R 0.090(10) 0.120(11) 0.065(8) 0.000(8) 0.050(7) 0.029(8)
C6R 0.053(7) 0.094(8) 0.049(6) -0.004(6) 0.018(5) 0.011(6)
C1T 0.029(5) 0.028(4) 0.034(4) 0.003(4) -0.004(3) 0.004(4)
C2T 0.065(7) 0.042(6) 0.055(6) 0.016(5) 0.013(5) -0.008(5)
C3T 0.077(8) 0.041(6) 0.072(7) 0.013(5) 0.012(6) -0.015(5)
C4T 0.083(9) 0.034(6) 0.152(12) 0.017(7) 0.036(8) 0.017(6)
C5T 0.098(10) 0.028(6) 0.216(15) -0.006(8) 0.087(10) 0.009(6)
C6T 0.094(9) 0.034(6) 0.121(9) -0.010(6) 0.066(8) -0.013(6)
C1U 0.033(5) 0.026(5) 0.030(4) -0.009(4) 0.004(3) 0.002(4)
C2U 0.082(8) 0.050(7) 0.092(8) 0.020(6) -0.048(6) -0.036(6)
C3U 0.121(12) 0.053(7) 0.138(11) 0.043(8) -0.087(9) -0.017(7)
C4U 0.071(8) 0.045(6) 0.083(7) -0.016(6) -0.052(6) 0.020(6)
C5U 0.032(6) 0.067(7) 0.063(6) -0.030(6) -0.006(5) 0.010(5)
C6U 0.038(6) 0.049(6) 0.052(5) -0.004(5) 0.006(4) -0.008(4)
C1V 0.026(5) 0.043(5) 0.030(4) -0.007(4) -0.005(3) -0.004(4)
C2V 0.056(6) 0.047(6) 0.055(6) -0.007(5) 0.021(5) 0.011(5)
C3V 0.065(7) 0.089(9) 0.046(6) -0.007(6) 0.025(5) 0.010(6)
C4V 0.071(7) 0.076(8) 0.040(5) 0.003(6) 0.025(5) -0.010(6)
C5V 0.082(8) 0.055(7) 0.037(5) 0.004(5) 0.012(5) -0.022(6)
C6V 0.070(7) 0.050(6) 0.039(5) -0.003(5) 0.016(5) -0.006(5)
C1X 0.039(5) 0.037(5) 0.031(4) -0.008(4) 0.007(4) -0.001(4)
C2X 0.062(7) 0.053(7) 0.082(7) 0.005(6) -0.013(6) -0.019(5)
C3X 0.054(7) 0.070(8) 0.101(9) -0.022(7) -0.021(7) -0.018(6)
C4X 0.086(9) 0.097(10) 0.047(6) 0.008(6) -0.012(6) -0.023(7)
C5X 0.151(14) 0.152(14) 0.123(11) 0.091(10) -0.096(10) -0.090(12)
C6X 0.093(10) 0.099(9) 0.079(8) 0.037(7) -0.039(7) -0.051(7)
C1Y 0.045(6) 0.040(5) 0.030(4) 0.001(4) 0.013(4) 0.016(4)
C2Y 0.115(11) 0.102(10) 0.083(8) 0.062(8) -0.025(7) -0.056(8)
C3Y 0.124(13) 0.100(11) 0.117(11) 0.061(10) -0.006(10) -0.032(9)
C4Y 0.163(15) 0.072(9) 0.052(7) 0.027(7) -0.012(8) 0.006(9)
C5Y 0.22(2) 0.170(17) 0.085(10) 0.063(11) -0.057(10) -0.090(15)
C6Y 0.099(10) 0.167(13) 0.061(7) 0.070(8) -0.038(7) -0.053(9)
C1Z 0.033(5) 0.038(5) 0.034(4) 0.002(4) 0.015(4) 0.003(4)
C2Z 0.037(6) 0.037(5) 0.061(6) 0.002(5) 0.013(4) 0.006(4)
C3Z 0.037(6) 0.072(7) 0.063(6) 0.014(6) 0.008(5) -0.005(5)
C4Z 0.038(6) 0.074(8) 0.068(6) 0.005(6) 0.015(5) 0.022(6)
C5Z 0.060(8) 0.039(6) 0.093(8) -0.014(6) 0.020(6) 0.011(5)
C6Z 0.030(5) 0.050(6) 0.070(6) -0.020(5) 0.011(4) 0.007(4)
Cl1A 0.490(15) 0.481(15) 0.170(6) 0.006(7) -0.066(7) -0.264(12)
Cl1B 0.225(8) 0.463(14) 0.189(6) 0.045(7) -0.085(5) -0.023(8)
Cl2A 0.204(7) 0.357(11) 0.300(8) -0.046(8) 0.096(6) -0.066(7)
Cl2B 0.218(7) 0.240(7) 0.306(8) -0.056(6) 0.092(6) -0.027(6)
Cl3A 0.281(9) 0.251(8) 0.200(6) 0.014(5) -0.027(5) 0.007(6)
Cl3B 0.421(12) 0.263(8) 0.139(5) -0.009(5) 0.000(6) 0.127(8)

_geom_special_details
;
 All esds (except the esd in the dihedral angle between two l.s. planes)
 are estimated using the full covariance matrix.  The cell esds are taken
 into account individually in the estimation of esds in distances, angles
 and torsion angles; correlations between esds in cell parameters are only
 used when they are defined by crystal symmetry.  An approximate (isotropic)
 treatment of cell esds is used for estimating esds involving l.s. planes.
;

loop_
 _geom_bond_atom_site_label_1
 _geom_bond_atom_site_label_2
 _geom_bond_distance
 _geom_bond_site_symmetry_2
 _geom_bond_publ_flag
Cu1 P2 2.272(2) . ?
Cu1 P1 2.284(2) . ?
Cu1 S1 2.378(2) . ?
Cu1 S2 2.392(2) . ?
Cu2 P3 2.278(2) . ?
Cu2 P4 2.293(2) . ?
Cu2 S1 2.357(2) . ?
Cu2 S2 2.392(2) . ?
Cu3 P5 2.189(2) . ?
Cu3 S4 2.321(2) . ?
Cu3 S3 2.356(2) . ?
Cu3 S2 2.448(2) . ?
Cu3 Cu4 2.6408(12) . ?
Cu4 P6 2.186(2) . ?
Cu4 S4 2.341(2) . ?
Cu4 S2 2.419(2) . ?
Cu4 S3 2.424(2) . ?
Cu5 P8 2.282(2) . ?
Cu5 P7 2.296(2) . ?
Cu5 S5 2.367(2) . ?
Cu5 S6 2.389(2) . ?
Cu6 P10 2.276(2) . ?
Cu6 P9 2.279(2) . ?
Cu6 S5 2.365(2) . ?
Cu6 S6 2.4030(19) . ?
Cu7 P11 2.189(2) . ?
Cu7 S8 2.334(2) . ?
Cu7 S6 2.407(2) . ?
Cu7 S7 2.423(2) . ?
Cu7 Cu8 2.6126(13) . ?
Cu8 P12 2.185(2) . ?
Cu8 S8 2.320(2) . ?
Cu8 S7 2.360(2) . ?
Cu8 S6 2.464(2) . ?
P1 C1A 1.794(5) . ?
P1 C1B 1.829(7) . ?
P1 C21 1.836(7) . ?
P1 C101 1.891(5) . ?
P2 C1D 1.833(8) . ?
P2 C22 1.841(7) . ?
P2 C1C 1.852(8) . ?
P3 C1E 1.825(8) . ?
P3 C1F 1.835(8) . ?
P3 C22 1.836(7) . ?
P4 C1G 1.812(8) . ?
P4 C1H 1.833(7) . ?
P4 C23 1.845(7) . ?
P5 C23 1.825(7) . ?
P5 C1J 1.836(8) . ?
P5 C1I 1.840(8) . ?
P6 C1L 1.816(8) . ?
P6 C1K 1.831(8) . ?
P6 C21 1.839(7) . ?
P7 C1N 1.827(7) . ?
P7 C44 1.845(7) . ?
P7 C1M 1.852(8) . ?
P8 C45 1.832(7) . ?
P8 C1P 1.839(7) . ?
P8 C1O 1.844(8) . ?
P9 C45 1.819(7) . ?
P9 C1R 1.831(7) . ?
P9 C1T 1.842(7) . ?
P10 C1V 1.831(7) . ?
P10 C1U 1.846(8) . ?
P10 C46 1.846(7) . ?
P11 C1W 1.810(5) . ?
P11 C1X 1.812(8) . ?
P11 C46 1.841(7) . ?
P11 C111 1.853(5) . ?
P12 C44 1.837(7) . ?
P12 C1Y 1.839(8) . ?
P12 C1Z 1.841(8) . ?
S1 C1 1.768(8) . ?
S2 C9 1.784(7) . ?
S3 C11 1.767(8) . ?
S4 C19 1.773(8) . ?
S5 C24 1.770(8) . ?
S6 C32 1.800(7) . ?
S7 C34 1.750(9) . ?
S8 C42 1.767(8) . ?
C1 C2 1.387(11) . ?
C1 C10 1.445(11) . ?
C2 C3 1.377(12) . ?
C3 C4 1.335(13) . ?
C4 C5 1.418(12) . ?
C5 C6 1.378(12) . ?
C5 C10 1.435(10) . ?
C6 C7 1.372(12) . ?
C7 C8 1.383(11) . ?
C8 C9 1.386(10) . ?
C9 C10 1.447(10) . ?
C11 C12 1.383(11) . ?
C11 C20 1.427(10) . ?
C12 C13 1.410(13) . ?
C13 C14 1.330(13) . ?
C14 C15 1.378(13) . ?
C15 C16 1.415(13) . ?
C15 C20 1.431(11) . ?
C16 C17 1.355(14) . ?
C17 C18 1.397(13) . ?
C18 C19 1.373(11) . ?
C19 C20 1.435(11) . ?
C24 C25 1.378(10) . ?
C24 C33 1.444(10) . ?
C25 C26 1.391(12) . ?
C26 C27 1.371(12) . ?
C27 C28 1.406(11) . ?
C28 C29 1.405(11) . ?
C28 C33 1.444(11) . ?
C29 C30 1.357(12) . ?
C30 C31 1.385(11) . ?
C31 C32 1.373(10) . ?
C32 C33 1.431(10) . ?
C34 C35 1.389(11) . ?
C34 C43 1.447(12) . ?
C35 C36 1.402(13) . ?
C36 C37 1.331(14) . ?
C37 C38 1.428(13) . ?
C38 C39 1.371(13) . ?
C38 C43 1.452(11) . ?
C39 C40 1.353(13) . ?
C40 C41 1.397(13) . ?
C41 C42 1.349(11) . ?
C42 C43 1.458(11) . ?
C1A C2A 1.3900 . ?
C1A C6A 1.3900 . ?
C2A C3A 1.3900 . ?
C3A C4A 1.3900 . ?
C4A C5A 1.3900 . ?
C5A C6A 1.3900 . ?
C101 C102 1.3898 . ?
C101 C106 1.3902 . ?
C102 C103 1.3902 . ?
C103 C104 1.3899 . ?
C104 C105 1.3898 . ?
C105 C106 1.3903 . ?
C1B C6B 1.370(10) . ?
C1B C2B 1.373(10) . ?
C2B C3B 1.369(12) . ?
C3B C4B 1.353(13) . ?
C4B C5B 1.322(13) . ?
C5B C6B 1.399(12) . ?
C1C C2C 1.370(10) . ?
C1C C6C 1.371(11) . ?
C2C C3C 1.389(12) . ?
C3C C4C 1.334(14) . ?
C4C C5C 1.350(12) . ?
C5C C6C 1.380(10) . ?
C1D C2D 1.360(11) . ?
C1D C6D 1.374(11) . ?
C2D C3D 1.388(12) . ?
C3D C4D 1.359(13) . ?
C4D C5D 1.364(14) . ?
C5D C6D 1.365(12) . ?
C1E C2E 1.384(11) . ?
C1E C6E 1.394(11) . ?
C2E C3E 1.379(12) . ?
C3E C4E 1.351(13) . ?
C4E C5E 1.379(14) . ?
C5E C6E 1.404(13) . ?
C1F C2F 1.393(11) . ?
C1F C6F 1.396(10) . ?
C2F C3F 1.346(10) . ?
C3F C4F 1.382(12) . ?
C4F C5F 1.359(12) . ?
C5F C6F 1.376(11) . ?
C1G C2G 1.379(10) . ?
C1G C6G 1.390(10) . ?
C2G C3G 1.400(11) . ?
C3G C4G 1.384(12) . ?
C4G C5G 1.356(12) . ?
C5G C6G 1.371(11) . ?
C1H C6H 1.375(9) . ?
C1H C2H 1.386(10) . ?
C2H C3H 1.376(10) . ?
C3H C4H 1.355(11) . ?
C4H C5H 1.379(12) . ?
C5H C6H 1.382(11) . ?
C1I C6I 1.361(11) . ?
C1I C2I 1.366(11) . ?
C2I C3I 1.352(12) . ?
C3I C4I 1.360(12) . ?
C4I C5I 1.323(14) . ?
C5I C6I 1.384(13) . ?
C1J C6J 1.332(10) . ?
C1J C2J 1.374(11) . ?
C2J C3J 1.365(14) . ?
C3J C4J 1.338(14) . ?
C4J C5J 1.342(13) . ?
C5J C6J 1.400(12) . ?
C1K C2K 1.350(12) . ?
C1K C6K 1.368(11) . ?
C2K C3K 1.359(15) . ?
C3K C4K 1.361(16) . ?
C4K C5K 1.373(15) . ?
C5K C6K 1.379(13) . ?
C1L C6L 1.369(10) . ?
C1L C2L 1.379(10) . ?
C2L C3L 1.381(11) . ?
C3L C4L 1.366(12) . ?
C4L C5L 1.381(13) . ?
C5L C6L 1.413(12) . ?
C1M C6M 1.357(11) . ?
C1M C2M 1.383(11) . ?
C2M C3M 1.383(12) . ?
C3M C4M 1.333(13) . ?
C4M C5M 1.364(13) . ?
C5M C6M 1.397(12) . ?
C1N C6N 1.368(10) . ?
C1N C2N 1.380(10) . ?
C2N C3N 1.374(11) . ?
C3N C4N 1.377(12) . ?
C4N C5N 1.382(11) . ?
C5N C6N 1.371(10) . ?
C1O C2O 1.381(11) . ?
C1O C6O 1.407(10) . ?
C2O C3O 1.376(11) . ?
C3O C4O 1.366(12) . ?
C4O C5O 1.382(12) . ?
C5O C6O 1.358(11) . ?
C1P C2P 1.366(11) . ?
C1P C6P 1.383(11) . ?
C2P C3P 1.367(11) . ?
C3P C4P 1.362(13) . ?
C4P C5P 1.345(13) . ?
C5P C6P 1.393(11) . ?
C1R C6R 1.370(11) . ?
C1R C2R 1.380(11) . ?
C2R C3R 1.371(11) . ?
C3R C4R 1.365(15) . ?
C4R C5R 1.342(14) . ?
C5R C6R 1.387(12) . ?
C1T C6T 1.371(11) . ?
C1T C2T 1.378(10) . ?
C2T C3T 1.356(12) . ?
C3T C4T 1.354(12) . ?
C4T C5T 1.350(13) . ?
C5T C6T 1.375(13) . ?
C1U C2U 1.345(11) . ?
C1U C6U 1.385(10) . ?
C2U C3U 1.423(14) . ?
C3U C4U 1.369(15) . ?
C4U C5U 1.323(12) . ?
C5U C6U 1.366(12) . ?
C1V C6V 1.361(11) . ?
C1V C2V 1.397(10) . ?
C2V C3V 1.391(11) . ?
C3V C4V 1.351(13) . ?
C4V C5V 1.351(12) . ?
C5V C6V 1.383(10) . ?
C1W C2W 1.3900 . ?
C1W C6W 1.3900 . ?
C2W C3W 1.3900 . ?
C3W C4W 1.3900 . ?
C4W C5W 1.3900 . ?
C5W C6W 1.3900 . ?
C111 C112 1.3900 . ?
C111 C116 1.3900 . ?
C112 C113 1.3899 . ?
C113 C114 1.3898 . ?
C114 C115 1.3901 . ?
C115 C116 1.3899 . ?
C1X C6X 1.344(11) . ?
C1X C2X 1.384(11) . ?
C2X C3X 1.397(13) . ?
C3X C4X 1.304(13) . ?
C4X C5X 1.340(15) . ?
C5X C6X 1.415(14) . ?
C1Y C6Y 1.323(12) . ?
C1Y C2Y 1.343(12) . ?
C2Y C3Y 1.376(14) . ?
C3Y C4Y 1.321(16) . ?
C4Y C5Y 1.321(17) . ?
C5Y C6Y 1.364(14) . ?
C1Z C6Z 1.362(11) . ?
C1Z C2Z 1.387(11) . ?
C2Z C3Z 1.375(11) . ?
C3Z C4Z 1.398(12) . ?
C4Z C5Z 1.340(13) . ?
C5Z C6Z 1.369(12) . ?
C1S Cl1A 1.874(18) . ?
C1S Cl1B 1.898(18) . ?
C2S Cl2B 1.743(15) . ?
C2S Cl2A 1.820(16) . ?
C3S Cl3A 1.692(14) . ?
C3S Cl3B 1.812(14) . ?

loop_
 _geom_angle_atom_site_label_1
 _geom_angle_atom_site_label_2
 _geom_angle_atom_site_label_3
 _geom_angle
 _geom_angle_site_symmetry_1
 _geom_angle_site_symmetry_3
 _geom_angle_publ_flag
P2 Cu1 P1 109.57(8) . . ?
P2 Cu1 S1 107.98(8) . . ?
P1 Cu1 S1 122.25(8) . . ?
P2 Cu1 S2 115.99(8) . . ?
P1 Cu1 S2 115.78(8) . . ?
S1 Cu1 S2 83.37(7) . . ?
P3 Cu2 P4 106.91(8) . . ?
P3 Cu2 S1 106.50(8) . . ?
P4 Cu2 S1 131.75(8) . . ?
P3 Cu2 S2 116.73(7) . . ?
P4 Cu2 S2 110.30(7) . . ?
S1 Cu2 S2 83.81(7) . . ?
P5 Cu3 S4 123.38(8) . . ?
P5 Cu3 S3 129.49(8) . . ?
S4 Cu3 S3 89.92(7) . . ?
P5 Cu3 S2 116.40(8) . . ?
S4 Cu3 S2 89.11(7) . . ?
S3 Cu3 S2 98.99(7) . . ?
P5 Cu3 Cu4 172.17(7) . . ?
S4 Cu3 Cu4 55.86(5) . . ?
S3 Cu3 Cu4 57.70(6) . . ?
S2 Cu3 Cu4 56.62(5) . . ?
P6 Cu4 S4 131.64(8) . . ?
P6 Cu4 S2 123.02(8) . . ?
S4 Cu4 S2 89.35(7) . . ?
P6 Cu4 S3 117.71(8) . . ?
S4 Cu4 S3 87.81(7) . . ?
S2 Cu4 S3 97.93(7) . . ?
P6 Cu4 Cu3 171.78(7) . . ?
S4 Cu4 Cu3 55.15(5) . . ?
S2 Cu4 Cu3 57.67(5) . . ?
S3 Cu4 Cu3 55.24(5) . . ?
P8 Cu5 P7 106.75(8) . . ?
P8 Cu5 S5 106.36(7) . . ?
P7 Cu5 S5 132.00(8) . . ?
P8 Cu5 S6 116.41(8) . . ?
P7 Cu5 S6 110.81(7) . . ?
S5 Cu5 S6 83.60(7) . . ?
P10 Cu6 P9 106.69(8) . . ?
P10 Cu6 S5 123.48(8) . . ?
P9 Cu6 S5 110.18(8) . . ?
P10 Cu6 S6 116.28(7) . . ?
P9 Cu6 S6 115.91(7) . . ?
S5 Cu6 S6 83.35(7) . . ?
P11 Cu7 S8 131.74(9) . . ?
P11 Cu7 S6 120.16(8) . . ?
S8 Cu7 S6 90.49(7) . . ?
P11 Cu7 S7 118.76(8) . . ?
S8 Cu7 S7 87.79(8) . . ?
S6 Cu7 S7 99.44(7) . . ?
P11 Cu7 Cu8 172.21(8) . . ?
S8 Cu7 Cu8 55.59(6) . . ?
S6 Cu7 Cu8 58.63(5) . . ?
S7 Cu7 Cu8 55.75(6) . . ?
P12 Cu8 S8 124.60(9) . . ?
P12 Cu8 S7 127.67(8) . . ?
S8 Cu8 S7 89.63(8) . . ?
P12 Cu8 S6 116.90(8) . . ?
S8 Cu8 S6 89.41(7) . . ?
S7 Cu8 S6 99.56(7) . . ?
P12 Cu8 Cu7 173.12(7) . . ?
S8 Cu8 Cu7 56.11(6) . . ?
S7 Cu8 Cu7 58.05(6) . . ?
S6 Cu8 Cu7 56.51(5) . . ?
C1A P1 C1B 97.5(4) . . ?
C1A P1 C21 106.3(3) . . ?
C1B P1 C21 104.6(3) . . ?
C1A P1 C101 5.1 . . ?
C1B P1 C101 102.3(3) . . ?
C21 P1 C101 103.2(3) . . ?
C1A P1 Cu1 126.9(2) . . ?
C1B P1 Cu1 109.3(2) . . ?
C21 P1 Cu1 109.7(2) . . ?
C101 P1 Cu1 125.71(19) . . ?
C1D P2 C22 103.8(4) . . ?
C1D P2 C1C 101.9(3) . . ?
C22 P2 C1C 101.7(3) . . ?
C1D P2 Cu1 113.0(3) . . ?
C22 P2 Cu1 114.7(2) . . ?
C1C P2 Cu1 119.8(3) . . ?
C1E P3 C1F 102.7(4) . . ?
C1E P3 C22 102.9(3) . . ?
C1F P3 C22 101.7(3) . . ?
C1E P3 Cu2 116.9(3) . . ?
C1F P3 Cu2 116.0(2) . . ?
C22 P3 Cu2 114.5(2) . . ?
C1G P4 C1H 104.3(3) . . ?
C1G P4 C23 101.6(3) . . ?
C1H P4 C23 101.0(3) . . ?
C1G P4 Cu2 108.4(2) . . ?
C1H P4 Cu2 126.6(2) . . ?
C23 P4 Cu2 111.9(2) . . ?
C23 P5 C1J 101.3(4) . . ?
C23 P5 C1I 105.2(3) . . ?
C1J P5 C1I 103.8(4) . . ?
C23 P5 Cu3 120.3(2) . . ?
C1J P5 Cu3 107.8(3) . . ?
C1I P5 Cu3 116.2(3) . . ?
C1L P6 C1K 101.2(4) . . ?
C1L P6 C21 104.3(3) . . ?
C1K P6 C21 104.2(3) . . ?
C1L P6 Cu4 113.2(2) . . ?
C1K P6 Cu4 112.6(3) . . ?
C21 P6 Cu4 119.3(2) . . ?
C1N P7 C44 100.8(3) . . ?
C1N P7 C1M 102.6(3) . . ?
C44 P7 C1M 101.9(3) . . ?
C1N P7 Cu5 108.3(2) . . ?
C44 P7 Cu5 112.0(3) . . ?
C1M P7 Cu5 127.7(3) . . ?
C45 P8 C1P 103.3(3) . . ?
C45 P8 C1O 102.1(3) . . ?
C1P P8 C1O 102.7(4) . . ?
C45 P8 Cu5 114.5(2) . . ?
C1P P8 Cu5 116.6(3) . . ?
C1O P8 Cu5 115.8(2) . . ?
C45 P9 C1R 102.8(3) . . ?
C45 P9 C1T 102.9(3) . . ?
C1R P9 C1T 100.6(3) . . ?
C45 P9 Cu6 113.7(2) . . ?
C1R P9 Cu6 114.8(3) . . ?
C1T P9 Cu6 119.7(2) . . ?
C1V P10 C1U 98.9(3) . . ?
C1V P10 C46 102.9(3) . . ?
C1U P10 C46 104.7(3) . . ?
C1V P10 Cu6 111.0(2) . . ?
C1U P10 Cu6 124.9(3) . . ?
C46 P10 Cu6 111.8(3) . . ?
C1W P11 C1X 102.5(4) . . ?
C1W P11 C46 104.6(4) . . ?
C1X P11 C46 103.9(3) . . ?
C1W P11 C111 4.3 . . ?
C1X P11 C111 106.2(4) . . ?
C46 P11 C111 101.3(3) . . ?
C1W P11 Cu7 110.8(2) . . ?
C1X P11 Cu7 114.0(3) . . ?
C46 P11 Cu7 119.2(3) . . ?
C111 P11 Cu7 110.8(2) . . ?
C44 P12 C1Y 104.6(4) . . ?
C44 P12 C1Z 101.0(3) . . ?
C1Y P12 C1Z 102.8(3) . . ?
C44 P12 Cu8 121.3(2) . . ?
C1Y P12 Cu8 115.9(3) . . ?
C1Z P12 Cu8 108.7(3) . . ?
C1 S1 Cu2 107.2(3) . . ?
C1 S1 Cu1 101.4(3) . . ?
Cu2 S1 Cu1 80.95(7) . . ?
C9 S2 Cu1 105.7(2) . . ?
C9 S2 Cu2 104.3(3) . . ?
Cu1 S2 Cu2 79.97(7) . . ?
C9 S2 Cu4 116.1(3) . . ?
Cu1 S2 Cu4 87.77(6) . . ?
Cu2 S2 Cu4 139.63(9) . . ?
C9 S2 Cu3 113.6(3) . . ?
Cu1 S2 Cu3 139.17(9) . . ?
Cu2 S2 Cu3 100.04(7) . . ?
Cu4 S2 Cu3 65.71(6) . . ?
C11 S3 Cu3 109.9(3) . . ?
C11 S3 Cu4 102.1(3) . . ?
Cu3 S3 Cu4 67.06(6) . . ?
C19 S4 Cu3 110.2(3) . . ?
C19 S4 Cu4 103.7(3) . . ?
Cu3 S4 Cu4 68.99(6) . . ?
C24 S5 Cu6 101.9(2) . . ?
C24 S5 Cu5 107.3(2) . . ?
Cu6 S5 Cu5 80.62(6) . . ?
C32 S6 Cu5 103.0(2) . . ?
C32 S6 Cu6 107.8(2) . . ?
Cu5 S6 Cu6 79.41(6) . . ?
C32 S6 Cu7 115.3(2) . . ?
Cu5 S6 Cu7 141.61(9) . . ?
Cu6 S6 Cu7 90.53(7) . . ?
C32 S6 Cu8 113.0(2) . . ?
Cu5 S6 Cu8 99.05(7) . . ?
Cu6 S6 Cu8 138.41(9) . . ?
Cu7 S6 Cu8 64.86(5) . . ?
C34 S7 Cu8 111.7(3) . . ?
C34 S7 Cu7 102.5(3) . . ?
Cu8 S7 Cu7 66.21(6) . . ?
C42 S8 Cu8 111.1(3) . . ?
C42 S8 Cu7 105.0(3) . . ?
Cu8 S8 Cu7 68.30(6) . . ?
C2 C1 C10 118.6(8) . . ?
C2 C1 S1 113.6(7) . . ?
C10 C1 S1 127.8(6) . . ?
C3 C2 C1 122.2(9) . . ?
C4 C3 C2 121.0(9) . . ?
C3 C4 C5 120.7(9) . . ?
C6 C5 C4 119.7(9) . . ?
C6 C5 C10 120.4(8) . . ?
C4 C5 C10 119.8(9) . . ?
C7 C6 C5 121.8(8) . . ?
C6 C7 C8 119.2(8) . . ?
C7 C8 C9 122.3(8) . . ?
C8 C9 C10 119.0(7) . . ?
C8 C9 S2 115.3(6) . . ?
C10 C9 S2 125.7(6) . . ?
C5 C10 C1 117.3(8) . . ?
C5 C10 C9 117.1(8) . . ?
C1 C10 C9 125.6(7) . . ?
C12 C11 C20 119.0(8) . . ?
C12 C11 S3 112.0(7) . . ?
C20 C11 S3 128.9(6) . . ?
C11 C12 C13 121.9(10) . . ?
C14 C13 C12 119.2(10) . . ?
C13 C14 C15 121.7(10) . . ?
C14 C15 C16 117.5(9) . . ?
C14 C15 C20 121.2(10) . . ?
C16 C15 C20 121.3(9) . . ?
C17 C16 C15 120.7(9) . . ?
C16 C17 C18 118.8(10) . . ?
C19 C18 C17 123.1(10) . . ?
C18 C19 C20 119.8(8) . . ?
C18 C19 S4 111.7(7) . . ?
C20 C19 S4 128.4(6) . . ?
C11 C20 C15 116.9(8) . . ?
C11 C20 C19 126.9(7) . . ?
C15 C20 C19 116.2(8) . . ?
P1 C21 P6 113.6(3) . . ?
P3 C22 P2 113.4(4) . . ?
P5 C23 P4 119.2(4) . . ?
C25 C24 C33 118.8(7) . . ?
C25 C24 S5 114.1(6) . . ?
C33 C24 S5 127.0(5) . . ?
C24 C25 C26 123.7(8) . . ?
C27 C26 C25 118.8(8) . . ?
C26 C27 C28 120.7(8) . . ?
C29 C28 C27 119.1(8) . . ?
C29 C28 C33 120.0(8) . . ?
C27 C28 C33 120.9(8) . . ?
C30 C29 C28 121.3(8) . . ?
C29 C30 C31 119.7(8) . . ?
C32 C31 C30 121.7(8) . . ?
C31 C32 C33 120.8(7) . . ?
C31 C32 S6 114.7(6) . . ?
C33 C32 S6 124.5(6) . . ?
C32 C33 C28 116.2(7) . . ?
C32 C33 C24 127.0(7) . . ?
C28 C33 C24 116.8(7) . . ?
C35 C34 C43 117.9(8) . . ?
C35 C34 S7 114.1(7) . . ?
C43 C34 S7 128.0(6) . . ?
C34 C35 C36 124.4(10) . . ?
C37 C36 C35 118.7(10) . . ?
C36 C37 C38 121.9(10) . . ?
C39 C38 C37 118.4(9) . . ?
C39 C38 C43 121.6(9) . . ?
C37 C38 C43 120.0(9) . . ?
C40 C39 C38 120.4(10) . . ?
C39 C40 C41 120.4(10) . . ?
C42 C41 C40 122.2(9) . . ?
C41 C42 C43 119.8(8) . . ?
C41 C42 S8 113.0(6) . . ?
C43 C42 S8 127.2(7) . . ?
C34 C43 C38 117.1(7) . . ?
C34 C43 C42 127.4(7) . . ?
C38 C43 C42 115.4(8) . . ?
P12 C44 P7 117.5(4) . . ?
P9 C45 P8 114.0(4) . . ?
P11 C46 P10 113.3(4) . . ?
C2A C1A C6A 120.0 . . ?
C2A C1A P1 118.1(3) . . ?
C6A C1A P1 121.7(3) . . ?
C3A C2A C1A 120.0 . . ?
C2A C3A C4A 120.0 . . ?
C5A C4A C3A 120.0 . . ?
C6A C5A C4A 120.0 . . ?
C5A C6A C1A 120.0 . . ?
C102 C101 C106 120.0 . . ?
C102 C101 P1 117.1(4) . . ?
C106 C101 P1 122.7(4) . . ?
C101 C102 C103 120.0 . . ?
C104 C103 C102 120.0 . . ?
C105 C104 C103 120.0 . . ?
C104 C105 C106 120.0 . . ?
C101 C106 C105 120.0 . . ?
C6B C1B C2B 116.0(8) . . ?
C6B C1B P1 126.0(6) . . ?
C2B C1B P1 118.0(6) . . ?
C3B C2B C1B 121.8(9) . . ?
C4B C3B C2B 120.8(9) . . ?
C5B C4B C3B 119.1(10) . . ?
C4B C5B C6B 120.8(9) . . ?
C1B C6B C5B 121.2(9) . . ?
C2C C1C C6C 118.4(7) . . ?
C2C C1C P2 120.7(7) . . ?
C6C C1C P2 120.9(6) . . ?
C1C C2C C3C 120.4(9) . . ?
C4C C3C C2C 120.2(10) . . ?
C3C C4C C5C 120.4(9) . . ?
C4C C5C C6C 120.5(9) . . ?
C1C C6C C5C 120.1(8) . . ?
C2D C1D C6D 118.4(8) . . ?
C2D C1D P2 117.9(7) . . ?
C6D C1D P2 123.6(7) . . ?
C1D C2D C3D 119.5(9) . . ?
C4D C3D C2D 121.2(10) . . ?
C3D C4D C5D 119.5(10) . . ?
C4D C5D C6D 119.2(10) . . ?
C5D C6D C1D 122.2(9) . . ?
C2E C1E C6E 117.8(8) . . ?
C2E C1E P3 120.3(7) . . ?
C6E C1E P3 121.9(7) . . ?
C3E C2E C1E 120.4(9) . . ?
C4E C3E C2E 122.1(10) . . ?
C3E C4E C5E 119.3(10) . . ?
C4E C5E C6E 119.5(10) . . ?
C1E C6E C5E 120.8(9) . . ?
C2F C1F C6F 117.8(7) . . ?
C2F C1F P3 121.1(6) . . ?
C6F C1F P3 120.7(6) . . ?
C3F C2F C1F 121.5(8) . . ?
C2F C3F C4F 119.7(9) . . ?
C5F C4F C3F 120.8(8) . . ?
C4F C5F C6F 119.7(8) . . ?
C5F C6F C1F 120.5(8) . . ?
C2G C1G C6G 117.2(7) . . ?
C2G C1G P4 116.7(6) . . ?
C6G C1G P4 126.0(6) . . ?
C1G C2G C3G 121.3(8) . . ?
C4G C3G C2G 119.5(9) . . ?
C5G C4G C3G 119.3(9) . . ?
C4G C5G C6G 121.1(8) . . ?
C5G C6G C1G 121.5(8) . . ?
C6H C1H C2H 118.5(7) . . ?
C6H C1H P4 123.4(6) . . ?
C2H C1H P4 118.1(5) . . ?
C3H C2H C1H 120.4(7) . . ?
C4H C3H C2H 121.2(8) . . ?
C3H C4H C5H 118.9(8) . . ?
C4H C5H C6H 120.7(8) . . ?
C1H C6H C5H 120.3(8) . . ?
C6I C1I C2I 117.3(8) . . ?
C6I C1I P5 124.6(7) . . ?
C2I C1I P5 118.2(6) . . ?
C3I C2I C1I 121.4(9) . . ?
C2I C3I C4I 120.8(10) . . ?
C5I C4I C3I 118.6(10) . . ?
C4I C5I C6I 121.4(10) . . ?
C1I C6I C5I 120.3(9) . . ?
C6J C1J C2J 118.0(8) . . ?
C6J C1J P5 117.8(6) . . ?
C2J C1J P5 124.2(7) . . ?
C3J C2J C1J 120.6(10) . . ?
C4J C3J C2J 120.3(11) . . ?
C3J C4J C5J 120.9(10) . . ?
C4J C5J C6J 118.2(10) . . ?
C1J C6J C5J 121.9(9) . . ?
C2K C1K C6K 116.9(9) . . ?
C2K C1K P6 119.6(7) . . ?
C6K C1K P6 123.5(7) . . ?
C1K C2K C3K 123.1(11) . . ?
C2K C3K C4K 120.8(12) . . ?
C3K C4K C5K 116.7(11) . . ?
C4K C5K C6K 121.8(11) . . ?
C1K C6K C5K 120.5(10) . . ?
C6L C1L C2L 118.2(7) . . ?
C6L C1L P6 125.8(6) . . ?
C2L C1L P6 115.9(6) . . ?
C1L C2L C3L 121.5(8) . . ?
C4L C3L C2L 120.8(9) . . ?
C3L C4L C5L 118.8(9) . . ?
C4L C5L C6L 120.0(9) . . ?
C1L C6L C5L 120.5(8) . . ?
C6M C1M C2M 118.0(8) . . ?
C6M C1M P7 120.3(6) . . ?
C2M C1M P7 121.6(7) . . ?
C3M C2M C1M 119.6(9) . . ?
C4M C3M C2M 122.3(9) . . ?
C3M C4M C5M 119.0(9) . . ?
C4M C5M C6M 119.7(10) . . ?
C1M C6M C5M 121.4(9) . . ?
C6N C1N C2N 119.2(7) . . ?
C6N C1N P7 126.0(6) . . ?
C2N C1N P7 114.7(6) . . ?
C3N C2N C1N 118.9(8) . . ?
C2N C3N C4N 122.2(8) . . ?
C3N C4N C5N 118.2(8) . . ?
C6N C5N C4N 119.7(8) . . ?
C1N C6N C5N 121.7(7) . . ?
C2O C1O C6O 118.5(7) . . ?
C2O C1O P8 121.4(6) . . ?
C6O C1O P8 119.8(6) . . ?
C3O C2O C1O 120.3(8) . . ?
C4O C3O C2O 121.2(9) . . ?
C3O C4O C5O 118.8(8) . . ?
C6O C5O C4O 121.4(9) . . ?
C5O C6O C1O 119.9(8) . . ?
C2P C1P C6P 117.0(7) . . ?
C2P C1P P8 123.3(7) . . ?
C6P C1P P8 119.6(6) . . ?
C1P C2P C3P 122.0(9) . . ?
C4P C3P C2P 119.6(9) . . ?
C5P C4P C3P 120.9(9) . . ?
C4P C5P C6P 119.0(9) . . ?
C1P C6P C5P 121.4(8) . . ?
C6R C1R C2R 118.1(7) . . ?
C6R C1R P9 119.8(6) . . ?
C2R C1R P9 122.0(6) . . ?
C3R C2R C1R 120.8(9) . . ?
C4R C3R C2R 120.0(10) . . ?
C5R C4R C3R 120.2(9) . . ?
C4R C5R C6R 120.3(11) . . ?
C1R C6R C5R 120.5(10) . . ?
C6T C1T C2T 117.0(8) . . ?
C6T C1T P9 121.2(6) . . ?
C2T C1T P9 121.6(6) . . ?
C3T C2T C1T 121.8(9) . . ?
C4T C3T C2T 120.6(9) . . ?
C5T C4T C3T 119.0(9) . . ?
C4T C5T C6T 121.1(10) . . ?
C1T C6T C5T 120.6(9) . . ?
C2U C1U C6U 118.8(8) . . ?
C2U C1U P10 118.3(6) . . ?
C6U C1U P10 122.8(6) . . ?
C1U C2U C3U 120.1(9) . . ?
C4U C3U C2U 119.2(10) . . ?
C5U C4U C3U 119.5(9) . . ?
C4U C5U C6U 122.2(9) . . ?
C5U C6U C1U 120.1(9) . . ?
C6V C1V C2V 117.6(7) . . ?
C6V C1V P10 125.8(6) . . ?
C2V C1V P10 116.4(6) . . ?
C3V C2V C1V 121.5(9) . . ?
C4V C3V C2V 118.8(9) . . ?
C3V C4V C5V 120.4(8) . . ?
C4V C5V C6V 121.4(9) . . ?
C1V C6V C5V 120.2(8) . . ?
C2W C1W C6W 120.0 . . ?
C2W C1W P11 115.9(5) . . ?
C6W C1W P11 123.8(5) . . ?
C1W C2W C3W 120.0 . . ?
C4W C3W C2W 120.0 . . ?
C3W C4W C5W 120.0 . . ?
C4W C5W C6W 120.0 . . ?
C5W C6W C1W 120.0 . . ?
C112 C111 C116 120.0 . . ?
C112 C111 P11 123.3(6) . . ?
C116 C111 P11 116.2(6) . . ?
C113 C112 C111 120.0 . . ?
C114 C113 C112 120.0 . . ?
C113 C114 C115 120.0 . . ?
C116 C115 C114 120.0 . . ?
C115 C116 C111 120.0 . . ?
C6X C1X C2X 116.8(8) . . ?
C6X C1X P11 118.8(7) . . ?
C2X C1X P11 124.4(7) . . ?
C1X C2X C3X 121.5(9) . . ?
C4X C3X C2X 121.3(10) . . ?
C3X C4X C5X 118.4(11) . . ?
C4X C5X C6X 122.5(11) . . ?
C1X C6X C5X 119.6(10) . . ?
C6Y C1Y C2Y 117.8(9) . . ?
C6Y C1Y P12 118.8(7) . . ?
C2Y C1Y P12 123.2(8) . . ?
C1Y C2Y C3Y 120.3(11) . . ?
C4Y C3Y C2Y 120.3(12) . . ?
C5Y C4Y C3Y 119.8(12) . . ?
C4Y C5Y C6Y 119.8(14) . . ?
C1Y C6Y C5Y 122.0(12) . . ?
C6Z C1Z C2Z 118.7(8) . . ?
C6Z C1Z P12 117.8(6) . . ?
C2Z C1Z P12 123.4(6) . . ?
C3Z C2Z C1Z 119.9(8) . . ?
C2Z C3Z C4Z 120.3(9) . . ?
C5Z C4Z C3Z 118.4(9) . . ?
C4Z C5Z C6Z 121.8(9) . . ?
C1Z C6Z C5Z 120.8(9) . . ?
Cl1A C1S Cl1B 100.1(11) . . ?
Cl2B C2S Cl2A 114.2(12) . . ?
Cl3A C3S Cl3B 118.1(11) . . ?

_diffrn_measured_fraction_theta_max    0.999
_diffrn_reflns_theta_full              25.00
_diffrn_measured_fraction_theta_full   0.999
_refine_diff_density_max    1.307
_refine_diff_density_min   -1.023
_refine_diff_density_rms    0.111

#===END
